# Supplementary material for: Altered Peripheral Blood Gene Expression in Childhood Cancer Survivors With Anthracycline‐Induced Cardiomyopathy – A COG‐ALTE03N1 Report
Source: PubMed Central journal article supplement — J Am Heart Assoc. 2023 Sep 26;12(19):e029954. doi: 10.1161/JAHA.123.029954 (PMC10727235; doi:10.1161/jaha.123.029954), 2023-09-26

# **Supplemental Material**

## **Data S1.**

### **Supplemental Methods**

#### **Human induced pluripotent stem cell derivation and culture**

Cells were routinely maintained in B8 medium<sup>6</sup> on 1:800 diluted growth factor-reduced Matrigel (Corning, 356230) in 6-well plates (Greiner).(22) B8 was supplemented with 2  $\mu$ M thiazovivin (LC Labs, T-9753), hereby referred to as B8T, for the first 24 h after passage. Media was then changed daily with B8. Cells were passaged at a ratio of ~1:15-20 every 4 days using 0.5 mM EDTA (Gibco, 15575020) in DPBS<sup>-/-</sup>, achieving ~80% confluence.

#### **CRISPR/Cas9 gRNA design**

DNA oligos (IDT) encoding each gRNA with BbsI ligation overhangs were annealed and inserted into the BbsI restriction site of a pSpCas9(BB)-2A-Puro (PX459, Addgene 62988) plasmid. The constructed gRNA expression plasmids were confirmed by Sanger sequencing (Eurofins) with the LK01\_5\_primer (5'-GACTATCATATGCTTACCG-3').

#### **CRISPR/Cas9-mediated knockout of candidate genes**

hiPSCs were cultured in B8 medium to ~80% confluence. Cells were harvested using 0.5 mM EDTA for 6 min at room temperature and resuspended in B8T medium;  $5 \times 10^6$  cells were electroporated with 5  $\mu$ g of each gRNA expression vector. Cells were maintained for 48 h in B8T medium supplemented with 0.5  $\mu$ g/mL puromycin (Gibco, A1113802). Puromycin-resistant individual colonies were picked and expanded ~10 days after electroporation. Genomic DNA was extracted from the cell pellets using a Quick-DNA Miniprep Plus kit (Zymo, D4068). Clones with

indels were identified by Sanger sequencing (Eurofins) with primers outside of the targeting region. Indels were detected using an online tool (<https://benchling.com>).

### **Quantitative Real-time PCR to assess the success of the candidate genes Knock out**

RNA was isolated using TRIzol reagent (Invitrogen, 15596026) and Direct-zol RNA microprep kit (Zymo, R2062) including on-column DNase digestion to remove genomic DNA. cDNA was produced from 2 µg of total RNA using a Maxima H Minus cDNA Synthesis Master Mix (Thermo Scientific, M1662). All PCR reactions were performed in triplicate in a 384-well plate format using TaqMan Gene Expression Master Mix (Applied Biosystems, 4444557) in a QuantStudio 5 Real-Time PCR System (Applied Biosystems, A28140). **Table S5** summarizes TaqMan probes. Relative quantification of gene expression was calculated using  $2^{-\Delta\Delta C_t}$  method, normalized to the reference 18S and untreated control samples.

### **Cardiac differentiation**

2-3 wells of hiPSC from a ~80% confluent 6-well plate were passaged using 0.5 mM EDTA in to Matrigel-coated 15 cm cell culture dishes, and grown in B8 medium for 4 days reaching ~80% confluence.

At the start of differentiation (day 0), B8 medium was changed to R6C, consisting of RPMI 1640 (Corning, 10-040-CM), supplemented with 6 µM of glycogen synthase kinase-3 inhibitor CHIR99021 (LC Labs, C-6556). On day 1, medium was changed to RPMI, and on day 2 medium was changed to RBA-C59, consisting of RPMI supplemented with 2 mg/mL fatty acid-free bovine serum albumin (GenDEPOT, A0100), 200 µg/mL L-ascorbic acid 2-phosphate (Wako, 321-44823) and 0.5 µM Wnt-C59 (Biorbyt, orb181132). Medium was then changed on day 4 and then

every other day with RBAI consisting of RPMI supplemented with 0.5 mg/mL fatty acid-free bovine serum albumin, 200 µg/mL L-ascorbic acid 2-phosphate and 1 µg/mL *E. coli*-derived recombinant human insulin (Gibco, A11382IJ). Contracting cells were noted from day 7, and differentiated cardiomyocytes were treated with 25 µg/mL of Zeocin from day 10 to day 14. On day 20 of differentiation, cardiomyocytes were dissociated using DPBS for 20 min at 37 °C followed by 1:200 Liberase TH (Roche, 5401151001) diluted in DPBS for 20 min at 37 °C, centrifuged at  $300 \times g$  for 5 min, counted and 40,000 cells were plated onto Matrigel-coated 384 well plate for cell viability assay after doxorubicin treatment in RBAI supplemented with 10% Cosmic Calf Serum (Cytiva, SH30087.03) for 48 h. RBAI was then changed every other day until day 30.

#### **Doxorubicin treatment and cell viability assay**

Doxorubicin hydrochloride (HY-15142, MedChem Express) was resuspended to 10 mM in cell culture-grade water (Corning), and aliquots were stored at -20 °C. Day 30 hiPSC-CMs were treated for 72 h with doxorubicin (0.01-100 µM) diluted in RPMI 1640 medium (Corning) supplemented with 500 µg/mL fatty acid-free bovine serum albumin (BSA) (GenDEPOT, A0100). Cell viability was assessed after 72 h of doxorubicin (0.01-100 µM) using a resazurin assay. Resazurin sodium salt (Thermo, B2118703) was diluted to 5 mg/mL in sterile ultrapure water and 600 µL frozen aliquots were made. One aliquot was added to 14.4 mL of DPBS and then further diluted 1:10 in RPMI. This was added to the cells 25 µL/well and incubated at 37 °C for 2.5 h. Fluorescence was measured using a VarioSkan Lux Multi-Mode Reader (Thermo Scientific) using top read, an excitation wavelength of 560 nm, and an emission wavelength of 590 nm. Data were presented as mean  $\pm$  SEM. Comparisons were conducted via one way-ANOVA test, an unpaired two-tailed Student's t-test, or F-test. The experiments were not randomized, and the investigators were not

blinded to allocation during experiments and outcome assessment. Data were analyzed using Excel and graphed using Prism 7.0 software (GraphPad), depicting standard dose-response guidelines.

**Table S1. List of Hallmark gene sets included and excluded from the analysis.**

| <b>HALLMARK GENE SET NAME</b>     | <b>ORIGINAL SIZE</b> | <b>AFTER<br/>RESTRICTING TO<br/>DATASET</b> | <b>STATUS</b> |
|-----------------------------------|----------------------|---------------------------------------------|---------------|
| TNFA_SIGNALING_VIA_NFKB           | 200                  | 169                                         |               |
| HYPOXIA                           | 200                  | 146                                         |               |
| CHOLESTEROL_HOMEOSTASIS           | 74                   | 62                                          |               |
| MITOTIC_SPINDLE                   | 199                  | 187                                         |               |
| WNT_BETA_CATENIN_SIGNALING        | 42                   | 36                                          |               |
| TGF_BETA_SIGNALING                | 54                   | 45                                          |               |
| IL6_JAK_STAT3_SIGNALING           | 87                   | 68                                          |               |
| DNA_REPAIR                        | 150                  | 144                                         |               |
| G2M_CHECKPOINT                    | 200                  | 180                                         |               |
| APOPTOSIS                         | 161                  | 138                                         |               |
| NOTCH_SIGNALING                   | 32                   | 27                                          |               |
| ADIPOGENESIS                      | 200                  | 168                                         |               |
| ESTROGEN_RESPONSE_EARLY           | 200                  | 138                                         |               |
| ESTROGEN_RESPONSE_LATE            | 200                  | 134                                         |               |
| ANDROGEN_RESPONSE                 | 100                  | 87                                          |               |
| MYOGENESIS                        | 200                  | 118                                         |               |
| PROTEIN_SECRETION                 | 96                   | 89                                          |               |
| INTERFERON_ALPHA_RESPONSE         | 97                   | 94                                          |               |
| INTERFERON_GAMMA_RESPONSE         | 200                  | 189                                         |               |
| APICAL_JUNCTION                   | 200                  | 132                                         |               |
| APICAL_SURFACE                    | 44                   | 28                                          |               |
| HEDGEHOG_SIGNALING                | 36                   | 24                                          |               |
| COMPLEMENT                        | 200                  | 161                                         |               |
| UNFOLDED_PROTEIN_RESPONSE         | 113                  | 108                                         |               |
| PI3K_AKT_MTOR_SIGNALING           | 105                  | 92                                          |               |
| MTORC1_SIGNALING                  | 200                  | 192                                         |               |
| E2F_TARGETS                       | 200                  | 187                                         |               |
| MYC_TARGETS_V1                    | 200                  | 199                                         |               |
| MYC_TARGETS_V2                    | 58                   | 57                                          |               |
| EPITHELIAL_MESENCHYMAL_TRANSITION | 200                  | 103                                         |               |
| INFLAMMATORY_RESPONSE             | 200                  | 148                                         |               |
| XENOBIOTIC_METABOLISM             | 200                  | 136                                         |               |
| FATTY_ACID_METABOLISM             | 158                  | 130                                         |               |
| OXIDATIVE_PHOSPHORYLATION         | 200                  | 196                                         |               |
| GLYCOLYSIS                        | 200                  | 149                                         |               |
| REACTIVE_OXYGEN_SPECIES_PATHWAY   | 49                   | 48                                          |               |
| P53_PATHWAY                       | 200                  | 173                                         |               |
| UV_RESPONSE_UP                    | 158                  | 125                                         |               |

| <b>HALLMARK GENE SET NAME</b> | <b>ORIGINAL SIZE</b> | <b>AFTER<br/>RESTRICTING TO<br/>DATASET</b> | <b>STATUS</b> |
|-------------------------------|----------------------|---------------------------------------------|---------------|
| TNFA_SIGNALING_VIA_NFKB       | 200                  | 169                                         |               |
| HYPOXIA                       | 200                  | 146                                         |               |
| CHOLESTEROL_HOMEOSTASIS       | 74                   | 62                                          |               |
| MITOTIC_SPINDLE               | 199                  | 187                                         |               |
| WNT_BETA_CATENIN_SIGNALING    | 42                   | 36                                          |               |
| TGF_BETA_SIGNALING            | 54                   | 45                                          |               |
| UV_RESPONSE_DN                | 144                  | 104                                         |               |
| ANGIOGENESIS                  | 36                   | 21                                          |               |
| HEME_METABOLISM               | 200                  | 186                                         |               |
| COAGULATION                   | 138                  | 82                                          |               |
| IL2_STAT5_SIGNALING           | 199                  | 172                                         |               |
| BILE_ACID_METABOLISM          | 112                  | 77                                          |               |
| PEROXISOME                    | 104                  | 89                                          |               |
| ALLOGRAFT_REJECTION           | 200                  | 166                                         |               |
| SPERMATOGENESIS               | 135                  | 64                                          |               |
| KRAS_SIGNALING_UP             | 200                  | 134                                         |               |
| KRAS_SIGNALING_DN             | 200                  | 81                                          |               |
| PANCREAS_BETA_CELLS           | 40                   | -                                           | Rejected!     |

**Table S2. List of Cardiomyopathy gene sets and their sizes included and excluded from the analysis.**

| CARDIOMYOPATHY GENE SET NAME                              | ORIGINAL SIZE | AFTER RESTRICTING TO DATASET | STATUS    |
|-----------------------------------------------------------|---------------|------------------------------|-----------|
| CHEN_LVAD_SUPPORT_OF_FAILING_HEART_DN                     | 42            | 25                           |           |
| CHEN_LVAD_SUPPORT_OF_FAILING_HEART_UP                     | 102           | 70                           |           |
| HP_ASYMMETRIC_SEPTAL_HYPERTROPHY                          | 11            |                              | Rejected! |
| HP_CONCENTRIC_HYPERTROPHIC_CARDIOMYOPATHY                 | 16            |                              | Rejected! |
| HP_DILATED_CARDIOMYOPATHY                                 | 148           | 97                           |           |
| HP_HYPERTROPHIC_CARDIOMYOPATHY                            | 254           | 206                          |           |
| HP_NONCOMPACTION_CARDIOMYOPATHY                           | 9             |                              | Rejected! |
| HP_RESTRICTIVE_CARDIOMYOPATHY                             | 15            |                              | Rejected! |
| HP_RIGHT_VENTRICULAR_CARDIOMYOPATHY                       | 9             |                              | Rejected! |
| KAAB_FAILED_HEART_ATRIUM_DN                               | 147           | 129                          |           |
| KAAB_FAILED_HEART_ATRIUM_UP                               | 36            | 23                           |           |
| KAAB_FAILED_HEART_VENTRICLE_DN                            | 44            | 34                           |           |
| KAAB_HEART_ATRIUM_VS_VENTRICLE_DN                         | 262           | 194                          |           |
| KAAB_HEART_ATRIUM_VS_VENTRICLE_UP                         | 256           | 174                          |           |
| KEGG_ARRHYTHMOGENIC_RIGHT_VENTRICULAR_CARDIOMYOPATHY_ARVC | 74            | 45                           |           |
| KEGG_DILATED_CARDIOMYOPATHY                               | 90            | 51                           |           |
| KEGG_HYPERTROPHIC_CARDIOMYOPATHY_HCM                      | 83            | 49                           |           |
| KEGG_VIRAL_MYOCARDITIS                                    | 70            | 51                           |           |
| WP_ARRHYTHMOGENIC_RIGHT_VENTRICULAR_CARDIOMYOPATHY        | 76            | 45                           |           |



**Table S3. Prioritization of Differentially Expressed Genes.**

| Gene Symbol    | Fold Change                | Padj     | Gene biotype   | Heart disease association or biological function                                                                                                                                               | Count of Matched pair upregulated (cases)/Total matched pairs | Expressed in Adult Heart (Y/N/L) | Expressed in hiPSC-CMs (Y/N/L) |
|----------------|----------------------------|----------|----------------|------------------------------------------------------------------------------------------------------------------------------------------------------------------------------------------------|---------------------------------------------------------------|----------------------------------|--------------------------------|
| <i>LDHA</i>    | Leading Edge GSEA Analysis |          | protein_coding | Significantly increased in the heart under hemodynamic stress, and cardiomyocyte-specific deletion of <i>LDHA</i> in mice leads to severe cardiac dysfunction in response to pressure overload | 24/40                                                         | Y                                | Y                              |
| <i>NKX3.1</i>  | -2.04                      | 3.25E-02 | protein_coding | Transcription factors involved in regulation of cardiac gene transcription and expression or associated with the response of cardiac tissue to stress                                          | 24/40                                                         | Y                                | Y                              |
| <i>ANKRD9</i>  | 2.11                       | 1.68E-03 | protein_coding | Role in hypertension and myocardial repolarization. Involved in intracellular lipid accumulation                                                                                               | 20/40                                                         | Y                                | Y                              |
| <i>RAP1GAP</i> | 4.09                       | 6.89E-04 | protein_coding | Mediates Ang II-induced cardiomyocyte hypertrophy                                                                                                                                              | 20/40                                                         | L                                | Y                              |
| <i>FAM20A</i>  | 2.48                       | 5.15E-06 | protein_coding | FAM20A controls FAM20C localization. FAM20C protects against heart failure                                                                                                                     | 16/40                                                         | Y                                | Y                              |
| <i>SLC6A9</i>  | 2.30                       | 3.78E-03 | protein_coding | Gene Variants associated with Human Essential Hypertension. DEG in Cardiomyocytes 2 Days Post Myocardial Infarction                                                                            | 12/40                                                         | Y                                | Y                              |
| <i>DAAM2</i>   | 2.03                       | 2.93E-02 | protein_coding | DAAM1 and DAAM2 are co-required for myocardial maturation and sarcomere assembly                                                                                                               | 4/40                                                          | Y                                | Y                              |
| <i>IFI27</i>   | 5.93                       | 6.55E-06 | protein_coding | Patented coronary heart disease diagnosis marker                                                                                                                                               | 21/40                                                         | Y                                | N                              |
| <i>KLC3</i>    | 2.01                       | 1.25E-02 | protein_coding | Gene Variants in Coronary Artery Disease                                                                                                                                                       | 14/40                                                         | Y                                | N                              |

| Gene Symbol    | Fold Change | Padj     | Gene biotype   | Heart disease association or biological function                                                                                                                   | Count of Matched pair upregulated (cases)/Total matched pairs | Expressed in Adult Heart (Y/N/L) | Expressed in hiPSC-CMs (Y/N/L) |
|----------------|-------------|----------|----------------|--------------------------------------------------------------------------------------------------------------------------------------------------------------------|---------------------------------------------------------------|----------------------------------|--------------------------------|
| <i>ALAS2</i>   | 2.29        | 7.42E-03 | protein_coding | Increased heme accumulation (through cardiac overexpression of ALAS2) leads to increased oxidative stress and cell death in the heart                              | 21/40                                                         | N                                | Y                              |
| <i>KLHDC8A</i> | 2.06        | 3.09E-03 | protein_coding | DEG in Cardiomyocytes 2 Days Post Myocardial Infarction and Paeoniflorin (PF) attenuated cardiac hypertrophy                                                       | 15/40                                                         | N                                | Y                              |
| <i>ITLN1</i>   | 2.09        | 7.61E-03 | protein_coding | Myocardial injury leads to a decrease in ITLN1 expression in the heart and a corresponding increase in plasma levels                                               | 12/40                                                         | N                                | Y                              |
| <i>HBG2</i>    | 4.00        | 1.20E-03 | protein_coding | Associated with 40 diseases including cardiovascular diseases                                                                                                      | 23/40                                                         | N                                | N                              |
| <i>HBD</i>     | 3.43        | 2.36E-04 | protein_coding | HBD activity a promising aid in the detection of myocardial infarction. Elevation of serum HBD occurred more frequently than a concurrent rise in serum GOT or LDH | 25/40                                                         | N                                | N                              |
| <i>ARG1</i>    | 3.23        | 1.42E-05 | protein_coding | Gene polymorphisms in idiopathic dilated cardiomyopathy. Role in AMI                                                                                               | 20/40                                                         | N                                | N                              |
| <i>CD177</i>   | 2.70        | 7.67E-03 | protein_coding | Abundance of CD177 transcript in acute Kawasaki Disease (acquired heart disease in children)                                                                       | 24/40                                                         | N                                | N                              |
| <i>GYPB</i>    | 2.69        | 7.92E-03 | protein_coding | Differentially Expressed Gene in Coronary Heart Disease. Greatest Fold-Change in Expression During CVD Risk Factor Modification                                    | 21/40                                                         | N                                | N                              |
| <i>ORM1</i>    | 2.61        | 7.17E-04 | protein_coding | Orosomuroid 1 Attenuates Doxorubicin-Induced Oxidative                                                                                                             | 21/40                                                         | N                                | N                              |

| Gene Symbol   | Fold Change | Padj     | Gene biotype   | Heart disease association or biological function                                                                                                                                                                                                                                                    | Count of Matched pair upregulated (cases)/Total matched pairs | Expressed in Adult Heart (Y/N/L) | Expressed in hiPSC-CMs (Y/N/L) |
|---------------|-------------|----------|----------------|-----------------------------------------------------------------------------------------------------------------------------------------------------------------------------------------------------------------------------------------------------------------------------------------------------|---------------------------------------------------------------|----------------------------------|--------------------------------|
|               |             |          |                | Stress and Apoptosis in Cardiomyocytes via Nrf2 Signaling                                                                                                                                                                                                                                           |                                                               |                                  |                                |
| <i>AHSP</i>   | 2.56        | 2.19E-03 | protein_coding | $\alpha$ -hemoglobin–stabilizing protein regulates arteriolar contractility                                                                                                                                                                                                                         | 25/40                                                         | N                                | N                              |
| <i>MCEMP1</i> | 2.50        | 6.35E-06 | protein_coding | MCEMP1 Gene Expression in cardiac cell lineage specific cardiac injury and repair                                                                                                                                                                                                                   | 24/40                                                         | N                                | N                              |
| <i>IFIT1B</i> | 2.36        | 4.40E-03 | protein_coding | Upregulated genes for congenital heart block versus healthy flow-sorted cardiac fibroblasts. Biphasic and cardiomyocyte-specific IFIT activity protects cardiomyocytes from enteroviral infection                                                                                                   | 21/40                                                         | N                                | N                              |
| <i>CA1</i>    | 2.34        | 2.78E-02 | protein_coding | Carbonic Anhydrase Activation Is Associated With Worsened Pathological Remodeling in Human Ischemic Diabetic Cardiomyopathy                                                                                                                                                                         | 24/40                                                         | N                                | N                              |
| <i>TSPO2</i>  | 2.31        | 3.78E-03 | protein_coding | Involved in Cholesterol Redistribution. Key gene involved in myocardial infarction                                                                                                                                                                                                                  | 11/40                                                         | N                                | N                              |
| <i>KLF1</i>   | 2.29        | 3.41E-03 | protein_coding | KLF protein disorders are involved in the pathogenesis of cardiovascular disease, such as cardiac development, cardiac hypertrophy, and atherosclerosis. Krüppel-like factor 1 (KLF-1) as a mediator of a cytoprotective response that dictates longevity induced by reduced mitochondrial function | 13/40                                                         | N                                | N                              |

| Gene Symbol     | Fold Change | Padj     | Gene biotype                       | Heart disease association or biological function                                                                                    | Count of Matched pair upregulated (cases)/Total matched pairs | Expressed in Adult Heart (Y/N/L) | Expressed in hiPSC-CMs (Y/N/L) |
|-----------------|-------------|----------|------------------------------------|-------------------------------------------------------------------------------------------------------------------------------------|---------------------------------------------------------------|----------------------------------|--------------------------------|
| <i>MMP8</i>     | 2.24        | 1.75E-02 | protein_coding                     | Indicator of Left Ventricular Remodeling and Cardiac Outcome in Patients after Acute Myocardial Infarction                          | 17/40                                                         | N                                | N                              |
| <i>OLFM4</i>    | 2.19        | 4.32E-02 | protein_coding                     | Greatest Fold-Change in Expression During CVD Risk Factor Modification                                                              |                                                               | N                                | N                              |
| <i>HP</i>       | 2.17        | 1.67E-03 | protein_coding                     | Inflammatory indicator in cardiovascular disease                                                                                    | 25/40                                                         | N                                | N                              |
| <i>VSIG4</i>    | 2.16        | 5.24E-04 | protein_coding                     | Right Ventricular Myocardial Biomarkers in Human Heart Failure                                                                      | 13/40                                                         | N                                | N                              |
| <i>S100A12</i>  | 2.14        | 4.91E-04 | protein_coding                     | Biomarker for predicting cardiovascular events                                                                                      | 23/40                                                         | N                                | N                              |
| <i>SPTA1</i>    | 2.14        | 4.40E-03 | protein_coding                     | Spectrins regulates cardiac function                                                                                                | 13/40                                                         | N                                | N                              |
| <i>KRT1</i>     | 2.04        | 2.60E-02 | protein_coding                     | Keratin-1 is a novel binding protein for C-reactive protein. CRP correlates with cardiovascular disease and endothelial dysfunction | 22/40                                                         | N                                | N                              |
| <i>CEACAM8</i>  | 2.01        | 5.12E-02 | protein_coding                     | Dietary Pattern Specific Protein Biomarkers for Cardiovascular Disease                                                              | 14/40                                                         | N                                | N                              |
| <i>ZDHHC19</i>  | 2.04        | 1.20E-03 | protein_coding                     | ZDHHC19 promote STAT3 activation. STAT3 is involved in the protective mechanisms against different cardiac pathologies              | 9/40                                                          | N                                | N                              |
| <i>HLA-DRB6</i> | 2.14        | 3.57E-02 | transcribed_unprocessed_pseudogene |                                                                                                                                     | NA                                                            |                                  |                                |
| -               | 2.19        | 5.02E-03 | lncRNA                             |                                                                                                                                     | NA                                                            |                                  |                                |
| <i>FCGR1CP</i>  | 2.17        | 3.57E-04 | unprocessed_pseudogene             |                                                                                                                                     | NA                                                            |                                  |                                |

| <b>Gene Symbol</b> | <b>Fold Change</b> | <b>Padj</b> | <b>Gene biotype</b> | <b>Heart disease association or biological function</b> | <b>Count of Matched pair upregulated (cases)/Total matched pairs</b> | <b>Expressed in Adult Heart (Y/N/L)</b> | <b>Expressed in hiPSC-CMs (Y/N/L)</b> |
|--------------------|--------------------|-------------|---------------------|---------------------------------------------------------|----------------------------------------------------------------------|-----------------------------------------|---------------------------------------|
| <i>IGKV1-27</i>    | 2.01               | 6.04E-03    | IG_V_gene           |                                                         | NA                                                                   |                                         |                                       |

Abbreviations: Y: Yes, N: N, L: Low

**Table S4. List of primers used to validate CRISPR/Cas9-mediated genome editing using Sanger sequencing.**

|                 |          |                               |
|-----------------|----------|-------------------------------|
| <i>LDHA</i> -KO | Exon2- F | 5' TGAGGAAAGGCCAGCCCCACTT 3'  |
|                 | Exon2- R | 5' AGTGGGGGTAGAGGATGGGGTCA 3' |

**Table S5. List of TaqMan probes used for RT-PCR to verify successful CRISPR/Cas9-mediated genome editing.**

| <b>Gene</b> | <b>TaqMan primers and probe</b> |
|-------------|---------------------------------|
| <i>LDHA</i> | Hs00855332 Applied Biosystems   |

**Table S6. GSEA Heat Map list of genes.**

| <b>NAME</b>     | <b>SCORE</b> | <b>NAME</b>      | <b>SCORE</b> |
|-----------------|--------------|------------------|--------------|
| <i>LDHA</i>     | 0.4979       | <i>ZNF789</i>    | -0.3589      |
| <i>TP53I3</i>   | 0.4971       | <i>C12orf42</i>  | -0.3594      |
| <i>GAPDH</i>    | 0.4730       | <i>LMLN</i>      | -0.3613      |
| <i>SEMA6B</i>   | 0.4677       | <i>DENND2C</i>   | -0.3629      |
| <i>LGALS1</i>   | 0.4630       | <i>ZNF850</i>    | -0.3638      |
| <i>AP1S1</i>    | 0.4603       | <i>RNF144A</i>   | -0.3646      |
| <i>ACAA1</i>    | 0.4469       | <i>TRABD2A</i>   | -0.3655      |
| <i>METTL9</i>   | 0.4469       | <i>RNF43</i>     | -0.3664      |
| <i>C19orf38</i> | 0.4444       | <i>NPIP3</i>     | -0.3665      |
| <i>FCGR1CP</i>  | 0.4410       | <i>BCL11B</i>    | -0.3665      |
| <i>EXOSC4</i>   | 0.4408       | <i>ZNF491</i>    | -0.3674      |
| <i>LAMTOR5</i>  | 0.4402       | <i>HMGB3P32</i>  | -0.3675      |
| <i>TIMM13</i>   | 0.4388       | <i>KLHL3</i>     | -0.3680      |
| <i>SLC39A1</i>  | 0.4296       | <i>KAT6B</i>     | -0.3681      |
| <i>DUSP3</i>    | 0.4263       | <i>ZNF891</i>    | -0.3689      |
| <i>PHETA2</i>   | 0.4240       | <i>ZNF827</i>    | -0.3695      |
| <i>SMARCD3</i>  | 0.4223       | <i>CROCCP3</i>   | -0.3723      |
| <i>MS4A4A</i>   | 0.4190       | <i>ADGRF3</i>    | -0.3724      |
| <i>PCBD1</i>    | 0.4187       | <i>CDHR3</i>     | -0.3726      |
| <i>MIIP</i>     | 0.4185       | <i>HP1BP3</i>    | -0.3737      |
| <i>CD36</i>     | 0.4160       | <i>RN7SL842P</i> | -0.3753      |
| <i>ATP5MF</i>   | 0.4146       | <i>AAK1</i>      | -0.3764      |
| <i>TMEM11</i>   | 0.4121       | <i>EXOSC6</i>    | -0.3779      |
| <i>COX5A</i>    | 0.4115       | <i>AKT3</i>      | -0.3788      |
| <i>MS4A6A</i>   | 0.4105       | <i>LINC00299</i> | -0.3805      |
| <i>DYNLL1</i>   | 0.4096       | <i>SLC16A10</i>  | -0.3810      |
| <i>PLP2</i>     | 0.4086       | <i>TRBJ1-6</i>   | -0.3884      |
| <i>RNF181</i>   | 0.4082       | <i>RPS2P55</i>   | -0.3903      |
| <i>GBGT1</i>    | 0.4081       | <i>FAM169A</i>   | -0.3906      |
| <i>SNAPIN</i>   | 0.4066       | <i>RNF125</i>    | -0.3909      |
| <i>NOL3</i>     | 0.4063       | <i>CEP126</i>    | -0.3914      |
| <i>TOMM40L</i>  | 0.4062       | <i>TSPOAP1</i>   | -0.3967      |
| <i>PGK1</i>     | 0.4054       | <i>TUBG1P</i>    | -0.3972      |
| <i>ECE2</i>     | 0.4049       | <i>TDRKH</i>     | -0.3974      |
| <i>SERPINB1</i> | 0.4045       | <i>ABI2</i>      | -0.4021      |
| <i>HEIH</i>     | 0.4043       | <i>ATM</i>       | -0.4098      |
| <i>LILRB4</i>   | 0.4041       | <i>NINL</i>      | -0.4098      |
| <i>IDH1</i>     | 0.4033       | <i>GABPB2</i>    | -0.4115      |



| <b>NAME</b>     | <b>SCORE</b> | <b>NAME</b>       | <b>SCORE</b> |
|-----------------|--------------|-------------------|--------------|
| <i>BLOC1S1</i>  | 0.4028       | <i>TRBJ1-3</i>    | -0.4128      |
| <i>HK3</i>      | 0.4027       | <i>SEPTIN7P2</i>  | -0.4216      |
| <i>CATSPER1</i> | 0.4019       | <i>TNRC6C</i>     | -0.4238      |
| <i>CTSH</i>     | 0.4011       | <i>ARL10</i>      | -0.4256      |
| <i>MPDU1</i>    | 0.3997       | <i>LRRC37A16P</i> | -0.4261      |
| <i>SIL1</i>     | 0.3987       | <i>NBPF15</i>     | -0.4265      |
| <i>MGST1</i>    | 0.3956       | <i>MFSD13B</i>    | -0.4276      |
| <i>TUBA1B</i>   | 0.3950       | <i>CARMIL1</i>    | -0.4284      |
| <i>ZG16B</i>    | 0.3941       | <i>MAP3K9</i>     | -0.4392      |
| <i>CNTLN</i>    | 0.3938       | <i>EPPK1</i>      | -0.4404      |
| <i>IFITM1</i>   | 0.3934       | <i>KIF3A</i>      | -0.4535      |

**Table S7. Gene set (HALLMARK\_ADIPOGENESIS) with genes up-regulated during adipocyte differentiation.**

| <b>GENE</b>    | <b>RANK IN GENE LIST</b> | <b>RANK METRIC SCORE</b> | <b>RUNNING ENRICHMENT SCORE</b> | <b>CORE ENRICHMENT</b> |
|----------------|--------------------------|--------------------------|---------------------------------|------------------------|
| <i>CD36</i>    | 20                       | 0.4160                   | 0.0139                          | Yes                    |
| <i>IDH1</i>    | 37                       | 0.4033                   | 0.0275                          | Yes                    |
| <i>UQCR10</i>  | 117                      | 0.3594                   | 0.0349                          | Yes                    |
| <i>COX8A</i>   | 120                      | 0.3583                   | 0.0480                          | Yes                    |
| <i>CYC1</i>    | 147                      | 0.3489                   | 0.0589                          | Yes                    |
| <i>PIM3</i>    | 156                      | 0.3469                   | 0.0711                          | Yes                    |
| <i>COX6A1</i>  | 168                      | 0.3438                   | 0.0830                          | Yes                    |
| <i>ITGA7</i>   | 180                      | 0.3415                   | 0.0947                          | Yes                    |
| <i>SUCLG1</i>  | 288                      | 0.3182                   | 0.0985                          | Yes                    |
| <i>GPX4</i>    | 340                      | 0.3111                   | 0.1062                          | Yes                    |
| <i>CD151</i>   | 366                      | 0.3070                   | 0.1157                          | Yes                    |
| <i>IFNGR1</i>  | 377                      | 0.3044                   | 0.1262                          | Yes                    |
| <i>CDKN2C</i>  | 388                      | 0.3025                   | 0.1366                          | Yes                    |
| <i>STOM</i>    | 389                      | 0.3022                   | 0.1477                          | Yes                    |
| <i>MRPL15</i>  | 395                      | 0.3015                   | 0.1585                          | Yes                    |
| <i>UQCRC1</i>  | 408                      | 0.3001                   | 0.1686                          | Yes                    |
| <i>POR</i>     | 447                      | 0.2948                   | 0.1767                          | Yes                    |
| <i>NDUFB7</i>  | 489                      | 0.2894                   | 0.1843                          | Yes                    |
| <i>GADD45A</i> | 514                      | 0.2866                   | 0.1931                          | Yes                    |
| <i>SQOR</i>    | 534                      | 0.2845                   | 0.2022                          | Yes                    |
| <i>ATP1B3</i>  | 536                      | 0.2843                   | 0.2126                          | Yes                    |
| <i>SDHB</i>    | 603                      | 0.2767                   | 0.2179                          | Yes                    |
| <i>ESRRA</i>   | 659                      | 0.2706                   | 0.2238                          | Yes                    |
| <i>DHRS7B</i>  | 661                      | 0.2702                   | 0.2337                          | Yes                    |
| <i>MTCH2</i>   | 810                      | 0.2575                   | 0.2322                          | Yes                    |
| <i>RAB34</i>   | 812                      | 0.2574                   | 0.2416                          | Yes                    |
| <i>MGST3</i>   | 827                      | 0.2561                   | 0.2500                          | Yes                    |
| <i>SLC1A5</i>  | 858                      | 0.2538                   | 0.2572                          | Yes                    |
| <i>RIOK3</i>   | 912                      | 0.2503                   | 0.2625                          | Yes                    |
| <i>JAGN1</i>   | 923                      | 0.2492                   | 0.2709                          | Yes                    |
| <i>ORM1</i>    | 950                      | 0.2478                   | 0.2781                          | Yes                    |
| <i>GHITM</i>   | 961                      | 0.2468                   | 0.2865                          | Yes                    |
| <i>FAH</i>     | 983                      | 0.2451                   | 0.2939                          | Yes                    |
| <i>CHCHD10</i> | 984                      | 0.2451                   | 0.3030                          | Yes                    |
| <i>PREB</i>    | 1051                     | 0.2411                   | 0.3070                          | Yes                    |
| <i>TKT</i>     | 1071                     | 0.2398                   | 0.3144                          | Yes                    |
| <i>RETN</i>    | 1075                     | 0.2397                   | 0.3230                          | Yes                    |

| <b>GENE</b>    | <b>RANK IN GENE LIST</b> | <b>RANK METRIC SCORE</b> | <b>RUNNING ENRICHMENT SCORE</b> | <b>CORE ENRICHMENT</b> |
|----------------|--------------------------|--------------------------|---------------------------------|------------------------|
| <i>UQCR11</i>  | 1079                     | 0.2394                   | 0.3316                          | Yes                    |
| <i>NDUFAB1</i> | 1206                     | 0.2330                   | 0.3309                          | Yes                    |
| <i>BCL6</i>    | 1212                     | 0.2326                   | 0.3391                          | Yes                    |
| <i>ACADS</i>   | 1228                     | 0.2316                   | 0.3465                          | Yes                    |
| <i>NDUFS3</i>  | 1255                     | 0.2298                   | 0.3530                          | Yes                    |
| <i>ECH1</i>    | 1309                     | 0.2271                   | 0.3575                          | Yes                    |
| <i>ACAA2</i>   | 1347                     | 0.2252                   | 0.3631                          | Yes                    |
| <i>PFKFB3</i>  | 1350                     | 0.2251                   | 0.3712                          | Yes                    |
| <i>DRAM2</i>   | 1355                     | 0.2248                   | 0.3792                          | Yes                    |
| <i>REEP5</i>   | 1385                     | 0.2233                   | 0.3853                          | Yes                    |
| <i>ARL4A</i>   | 1455                     | 0.2202                   | 0.3883                          | Yes                    |
| <i>CRAT</i>    | 1568                     | 0.2146                   | 0.3879                          | Yes                    |
| <i>ME1</i>     | 1611                     | 0.2121                   | 0.3926                          | Yes                    |
| <i>COX7B</i>   | 1614                     | 0.2120                   | 0.4003                          | Yes                    |
| <i>UQCRQ</i>   | 1722                     | 0.2062                   | 0.3999                          | Yes                    |
| <i>ALDOA</i>   | 1752                     | 0.2050                   | 0.4054                          | Yes                    |
| <i>PRDX3</i>   | 1765                     | 0.2045                   | 0.4120                          | Yes                    |
| <i>CMBL</i>    | 1851                     | 0.2003                   | 0.4131                          | Yes                    |
| <i>UCK1</i>    | 1896                     | 0.1988                   | 0.4172                          | Yes                    |
| <i>IDH3G</i>   | 1935                     | 0.1969                   | 0.4216                          | Yes                    |
| <i>DECR1</i>   | 2016                     | 0.1934                   | 0.4228                          | Yes                    |
| <i>LPCAT3</i>  | 2066                     | 0.1909                   | 0.4262                          | Yes                    |
| <i>ETFB</i>    | 2116                     | 0.1893                   | 0.4296                          | Yes                    |
| <i>DGAT1</i>   | 2142                     | 0.1881                   | 0.4346                          | Yes                    |
| <i>UCP2</i>    | 2143                     | 0.1881                   | 0.4416                          | Yes                    |
| <i>UBC</i>     | 2196                     | 0.1854                   | 0.4446                          | Yes                    |
| <i>PGM1</i>    | 2274                     | 0.1829                   | 0.4456                          | Yes                    |
| <i>DHRS7</i>   | 2323                     | 0.1807                   | 0.4487                          | Yes                    |
| <i>ATP5PO</i>  | 2332                     | 0.1804                   | 0.4548                          | Yes                    |
| <i>DLD</i>     | 2414                     | 0.1772                   | 0.4553                          | Yes                    |
| <i>MGLL</i>    | 2504                     | 0.1738                   | 0.4551                          | Yes                    |
| <i>GPAT4</i>   | 2534                     | 0.1726                   | 0.4593                          | Yes                    |
| <i>DHCR7</i>   | 2535                     | 0.1725                   | 0.4657                          | Yes                    |
| <i>C3</i>      | 2561                     | 0.1712                   | 0.4701                          | Yes                    |
| <i>MDH2</i>    | 2562                     | 0.1712                   | 0.4764                          | Yes                    |
| <i>TALDO1</i>  | 2633                     | 0.1688                   | 0.4775                          | Yes                    |
| <i>RNF11</i>   | 2635                     | 0.1687                   | 0.4836                          | Yes                    |
| <i>UBQLN1</i>  | 2735                     | 0.1650                   | 0.4824                          | Yes                    |
| <i>COQ3</i>    | 2801                     | 0.1625                   | 0.4836                          | Yes                    |

| <b>GENE</b>    | <b>RANK IN GENE LIST</b> | <b>RANK METRIC SCORE</b> | <b>RUNNING ENRICHMENT SCORE</b> | <b>CORE ENRICHMENT</b> |
|----------------|--------------------------|--------------------------|---------------------------------|------------------------|
| <i>GPD2</i>    | 2813                     | 0.1620                   | 0.4887                          | Yes                    |
| <i>SAMM50</i>  | 2834                     | 0.1614                   | 0.4932                          | Yes                    |
| <i>COQ5</i>    | 2887                     | 0.1592                   | 0.4952                          | Yes                    |
| <i>SOD1</i>    | 3000                     | 0.1552                   | 0.4926                          | Yes                    |
| <i>ITSN1</i>   | 3024                     | 0.1545                   | 0.4966                          | Yes                    |
| <i>PLIN2</i>   | 3033                     | 0.1544                   | 0.5017                          | Yes                    |
| <i>PEMT</i>    | 3379                     | 0.1424                   | 0.4814                          | No                     |
| <i>APLP2</i>   | 3487                     | 0.1387                   | 0.4786                          | No                     |
| <i>DNAJC15</i> | 3538                     | 0.1369                   | 0.4799                          | No                     |
| <i>ALDH2</i>   | 3553                     | 0.1364                   | 0.4839                          | No                     |
| <i>QDPR</i>    | 3593                     | 0.1350                   | 0.4860                          | No                     |
| <i>ARAF</i>    | 3594                     | 0.1349                   | 0.4910                          | No                     |
| <i>NABP1</i>   | 3630                     | 0.1340                   | 0.4933                          | No                     |
| <i>COQ9</i>    | 3784                     | 0.1291                   | 0.4868                          | No                     |
| <i>TST</i>     | 3797                     | 0.1287                   | 0.4906                          | No                     |
| <i>GRPEL1</i>  | 3844                     | 0.1273                   | 0.4919                          | No                     |
| <i>SLC25A1</i> | 3853                     | 0.1269                   | 0.4960                          | No                     |
| <i>PEX14</i>   | 3891                     | 0.1258                   | 0.4979                          | No                     |
| <i>ECHS1</i>   | 4233                     | 0.1149                   | 0.4769                          | No                     |
| <i>SULT1A1</i> | 4238                     | 0.1148                   | 0.4808                          | No                     |
| <i>STAT5A</i>  | 4260                     | 0.1142                   | 0.4835                          | No                     |
| <i>RTN3</i>    | 4268                     | 0.1140                   | 0.4871                          | No                     |
| <i>TANK</i>    | 4289                     | 0.1134                   | 0.4898                          | No                     |
| <i>ABCA1</i>   | 4382                     | 0.1107                   | 0.4871                          | No                     |
| <i>ELOVL6</i>  | 4436                     | 0.1086                   | 0.4872                          | No                     |
| <i>PHYH</i>    | 4463                     | 0.1074                   | 0.4892                          | No                     |
| <i>DNAJB9</i>  | 4488                     | 0.1065                   | 0.4914                          | No                     |
| <i>GBE1</i>    | 4607                     | 0.1018                   | 0.4864                          | No                     |
| <i>RETSAT</i>  | 4696                     | 0.0994                   | 0.4835                          | No                     |
| <i>HADH</i>    | 4767                     | 0.0972                   | 0.4819                          | No                     |
| <i>AGPAT3</i>  | 4817                     | 0.0956                   | 0.4818                          | No                     |
| <i>CD302</i>   | 4820                     | 0.0955                   | 0.4852                          | No                     |
| <i>AK2</i>     | 4832                     | 0.0952                   | 0.4879                          | No                     |
| <i>SCP2</i>    | 4842                     | 0.0949                   | 0.4907                          | No                     |
| <i>ACO2</i>    | 4858                     | 0.0942                   | 0.4931                          | No                     |
| <i>SLC66A3</i> | 4946                     | 0.0912                   | 0.4900                          | No                     |
| <i>NKIRAS1</i> | 5028                     | 0.0890                   | 0.4873                          | No                     |
| <i>NDUFA5</i>  | 5235                     | 0.0829                   | 0.4751                          | No                     |
| <i>SLC19A1</i> | 5365                     | 0.0790                   | 0.4684                          | No                     |

| <b>GENE</b>    | <b>RANK IN GENE LIST</b> | <b>RANK METRIC SCORE</b> | <b>RUNNING ENRICHMENT SCORE</b> | <b>CORE ENRICHMENT</b> |
|----------------|--------------------------|--------------------------|---------------------------------|------------------------|
| <i>SLC27A1</i> | 5366                     | 0.0789                   | 0.4713                          | No                     |
| <i>CAT</i>     | 5431                     | 0.0767                   | 0.4694                          | No                     |
| <i>ELMOD3</i>  | 5454                     | 0.0762                   | 0.4706                          | No                     |
| <i>BCL2L13</i> | 5710                     | 0.0679                   | 0.4542                          | No                     |
| <i>IDH3A</i>   | 5861                     | 0.0627                   | 0.4454                          | No                     |
| <i>ACOX1</i>   | 5992                     | 0.0582                   | 0.4379                          | No                     |
| <i>CHUK</i>    | 6077                     | 0.0555                   | 0.4338                          | No                     |
| <i>SCARB1</i>  | 6213                     | 0.0515                   | 0.4257                          | No                     |
| <i>YWHAG</i>   | 6238                     | 0.0507                   | 0.4258                          | No                     |
| <i>MIGA2</i>   | 6258                     | 0.0500                   | 0.4262                          | No                     |
| <i>ADIPOR2</i> | 6417                     | 0.0454                   | 0.4162                          | No                     |
| <i>AIFM1</i>   | 6485                     | 0.0436                   | 0.4128                          | No                     |
| <i>PFKL</i>    | 6510                     | 0.0428                   | 0.4126                          | No                     |
| <i>NMT1</i>    | 6720                     | 0.0366                   | 0.3985                          | No                     |
| <i>ENPP2</i>   | 6781                     | 0.0345                   | 0.3953                          | No                     |
| <i>ACADM</i>   | 7207                     | 0.0213                   | 0.3646                          | No                     |
| <i>REEP6</i>   | 7450                     | 0.0138                   | 0.3472                          | No                     |
| <i>IMMT</i>    | 7499                     | 0.0124                   | 0.3441                          | No                     |
| <i>ACLY</i>    | 7534                     | 0.0112                   | 0.3420                          | No                     |
| <i>RREB1</i>   | 7628                     | 0.0082                   | 0.3354                          | No                     |
| <i>CS</i>      | 8013                     | -0.0042                  | 0.3071                          | No                     |
| <i>SDHC</i>    | 8388                     | -0.0153                  | 0.2800                          | No                     |
| <i>HIBCH</i>   | 8585                     | -0.0217                  | 0.2663                          | No                     |
| <i>MCCC1</i>   | 8670                     | -0.0244                  | 0.2610                          | No                     |
| <i>MAP4K3</i>  | 8722                     | -0.0261                  | 0.2581                          | No                     |
| <i>MYLK</i>    | 8740                     | -0.0266                  | 0.2579                          | No                     |
| <i>ABCB8</i>   | 9158                     | -0.0401                  | 0.2285                          | No                     |
| <i>DLAT</i>    | 9306                     | -0.0453                  | 0.2192                          | No                     |
| <i>CPT2</i>    | 9472                     | -0.0498                  | 0.2089                          | No                     |
| <i>SOWAHC</i>  | 9512                     | -0.0510                  | 0.2079                          | No                     |
| <i>PTCD3</i>   | 9703                     | -0.0570                  | 0.1959                          | No                     |
| <i>SLC5A6</i>  | 9794                     | -0.0610                  | 0.1915                          | No                     |
| <i>RMDN3</i>   | 9804                     | -0.0615                  | 0.1931                          | No                     |
| <i>ATL2</i>    | 9894                     | -0.0647                  | 0.1889                          | No                     |
| <i>PPM1B</i>   | 10161                    | -0.0737                  | 0.1719                          | No                     |
| <i>VEGFB</i>   | 10386                    | -0.0813                  | 0.1583                          | No                     |
| <i>LIPE</i>    | 10463                    | -0.0840                  | 0.1558                          | No                     |
| <i>G3BP2</i>   | 10565                    | -0.0882                  | 0.1515                          | No                     |
| <i>GPX3</i>    | 10594                    | -0.0894                  | 0.1527                          | No                     |

| <b>GENE</b>     | <b>RANK IN GENE LIST</b> | <b>RANK METRIC SCORE</b> | <b>RUNNING ENRICHMENT SCORE</b> | <b>CORE ENRICHMENT</b> |
|-----------------|--------------------------|--------------------------|---------------------------------|------------------------|
| <i>GPHN</i>     | 10615                    | -0.0902                  | 0.1546                          | No                     |
| <i>PPP1R15B</i> | 10727                    | -0.0940                  | 0.1498                          | No                     |
| <i>GPAM</i>     | 10822                    | -0.0984                  | 0.1465                          | No                     |
| <i>CAVIN2</i>   | 10850                    | -0.0997                  | 0.1482                          | No                     |
| <i>SSPN</i>     | 10930                    | -0.1031                  | 0.1461                          | No                     |
| <i>CMPK1</i>    | 11063                    | -0.1088                  | 0.1404                          | No                     |
| <i>ANGPT1</i>   | 11332                    | -0.1207                  | 0.1250                          | No                     |
| <i>TOB1</i>     | 11621                    | -0.1331                  | 0.1085                          | No                     |
| <i>ESYT1</i>    | 11932                    | -0.1497                  | 0.0911                          | No                     |
| <i>DBT</i>      | 12083                    | -0.1579                  | 0.0858                          | No                     |
| <i>BAZ2A</i>    | 12346                    | -0.1736                  | 0.0728                          | No                     |
| <i>CCNG2</i>    | 12597                    | -0.1918                  | 0.0614                          | No                     |
| <i>EPHX2</i>    | 13023                    | -0.2314                  | 0.0384                          | No                     |
| <i>PDCD4</i>    | 13231                    | -0.2559                  | 0.0325                          | No                     |

**Table S8. Gene set (HALLMARK\_OXIDATIVE\_PHOSPHORYLATION) with genes encoding proteins involved in oxidative phosphorylation.**

| <b>GENE</b>     | <b>RANK IN GENE LIST</b> | <b>RANK METRIC SCORE</b> | <b>RUNNING ENRICHMENT SCORE</b> | <b>CORE ENRICHMENT</b> |
|-----------------|--------------------------|--------------------------|---------------------------------|------------------------|
| <i>LDHA</i>     | 0                        | 0.4979                   | 0.0137                          | Yes                    |
| <i>ACAA1</i>    | 6                        | 0.4469                   | 0.0257                          | Yes                    |
| <i>TIMM13</i>   | 12                       | 0.4388                   | 0.0374                          | Yes                    |
| <i>ATP5MF</i>   | 21                       | 0.4146                   | 0.0482                          | Yes                    |
| <i>COX5A</i>    | 23                       | 0.4115                   | 0.0595                          | Yes                    |
| <i>IDH1</i>     | 37                       | 0.4033                   | 0.0697                          | Yes                    |
| <i>NDUFS6</i>   | 71                       | 0.3814                   | 0.0777                          | Yes                    |
| <i>COX6B1</i>   | 88                       | 0.3742                   | 0.0869                          | Yes                    |
| <i>UQCR10</i>   | 117                      | 0.3594                   | 0.0947                          | Yes                    |
| <i>COX8A</i>    | 120                      | 0.3583                   | 0.1044                          | Yes                    |
| <i>ATP6V1C1</i> | 121                      | 0.3574                   | 0.1143                          | Yes                    |
| <i>UQCRRS1</i>  | 129                      | 0.3535                   | 0.1235                          | Yes                    |
| <i>CYC1</i>     | 147                      | 0.3489                   | 0.1319                          | Yes                    |
| <i>ATP5PD</i>   | 150                      | 0.3481                   | 0.1413                          | Yes                    |
| <i>HSD17B10</i> | 166                      | 0.3442                   | 0.1497                          | Yes                    |
| <i>COX6A1</i>   | 168                      | 0.3438                   | 0.1591                          | Yes                    |
| <i>HTRA2</i>    | 181                      | 0.3415                   | 0.1676                          | Yes                    |
| <i>ATP5F1B</i>  | 225                      | 0.3296                   | 0.1735                          | Yes                    |
| <i>ATP6V1F</i>  | 230                      | 0.3287                   | 0.1823                          | Yes                    |
| <i>SLC25A5</i>  | 267                      | 0.3220                   | 0.1885                          | Yes                    |
| <i>ETFA</i>     | 275                      | 0.3203                   | 0.1968                          | Yes                    |
| <i>SUCLG1</i>   | 288                      | 0.3182                   | 0.2047                          | Yes                    |
| <i>ATP5MC1</i>  | 291                      | 0.3178                   | 0.2133                          | Yes                    |
| <i>NDUFB4</i>   | 303                      | 0.3160                   | 0.2212                          | Yes                    |
| <i>MRPS15</i>   | 331                      | 0.3128                   | 0.2278                          | Yes                    |
| <i>GPX4</i>     | 340                      | 0.3111                   | 0.2358                          | Yes                    |
| <i>MRPL15</i>   | 395                      | 0.3015                   | 0.2401                          | Yes                    |
| <i>UQCRC1</i>   | 408                      | 0.3001                   | 0.2475                          | Yes                    |
| <i>POR</i>      | 447                      | 0.2948                   | 0.2528                          | Yes                    |
| <i>ECI1</i>     | 470                      | 0.2911                   | 0.2592                          | Yes                    |
| <i>NDUFA3</i>   | 482                      | 0.2900                   | 0.2664                          | Yes                    |
| <i>NDUFB7</i>   | 489                      | 0.2894                   | 0.2739                          | Yes                    |
| <i>ATP5F1A</i>  | 540                      | 0.2836                   | 0.2780                          | Yes                    |
| <i>ATP6V0E1</i> | 551                      | 0.2825                   | 0.2851                          | Yes                    |
| <i>ATP5MC3</i>  | 555                      | 0.2821                   | 0.2926                          | Yes                    |
| <i>NDUFA8</i>   | 567                      | 0.2812                   | 0.2996                          | Yes                    |
| <i>RHOT1</i>    | 580                      | 0.2797                   | 0.3064                          | Yes                    |

| <b>GENE</b>     | <b>RANK IN GENE LIST</b> | <b>RANK METRIC SCORE</b> | <b>RUNNING ENRICHMENT SCORE</b> | <b>CORE ENRICHMENT</b> |
|-----------------|--------------------------|--------------------------|---------------------------------|------------------------|
| <i>SDHB</i>     | 603                      | 0.2767                   | 0.3124                          | Yes                    |
| <i>ATP5F1E</i>  | 660                      | 0.2705                   | 0.3157                          | Yes                    |
| <i>MRPS11</i>   | 663                      | 0.2700                   | 0.3230                          | Yes                    |
| <i>CYB5R3</i>   | 665                      | 0.2698                   | 0.3304                          | Yes                    |
| <i>TIMM8B</i>   | 684                      | 0.2677                   | 0.3364                          | Yes                    |
| <i>ATP5F1C</i>  | 716                      | 0.2653                   | 0.3414                          | Yes                    |
| <i>MRPS12</i>   | 730                      | 0.2643                   | 0.3477                          | Yes                    |
| <i>NDUFA2</i>   | 768                      | 0.2608                   | 0.3522                          | Yes                    |
| <i>MRPL11</i>   | 772                      | 0.2606                   | 0.3592                          | Yes                    |
| <i>NDUFA6</i>   | 777                      | 0.2603                   | 0.3660                          | Yes                    |
| <i>TIMM10</i>   | 798                      | 0.2587                   | 0.3717                          | Yes                    |
| <i>UQCRC2</i>   | 821                      | 0.2565                   | 0.3771                          | Yes                    |
| <i>MGST3</i>    | 827                      | 0.2561                   | 0.3838                          | Yes                    |
| <i>COX5B</i>    | 841                      | 0.2552                   | 0.3899                          | Yes                    |
| <i>SURF1</i>    | 853                      | 0.2541                   | 0.3961                          | Yes                    |
| <i>PHB2</i>     | 856                      | 0.2539                   | 0.4029                          | Yes                    |
| <i>ATP6V0B</i>  | 901                      | 0.2507                   | 0.4066                          | Yes                    |
| <i>SLC25A11</i> | 924                      | 0.2491                   | 0.4118                          | Yes                    |
| <i>OXA1L</i>    | 960                      | 0.2469                   | 0.4160                          | Yes                    |
| <i>NDUFA4</i>   | 987                      | 0.2449                   | 0.4208                          | Yes                    |
| <i>HCCS</i>     | 1017                     | 0.2436                   | 0.4254                          | Yes                    |
| <i>ATP6V1D</i>  | 1031                     | 0.2429                   | 0.4311                          | Yes                    |
| <i>ATP5F1D</i>  | 1032                     | 0.2428                   | 0.4378                          | Yes                    |
| <i>ATP5MG</i>   | 1038                     | 0.2420                   | 0.4441                          | Yes                    |
| <i>NDUFC1</i>   | 1060                     | 0.2406                   | 0.4492                          | Yes                    |
| <i>UQCR11</i>   | 1079                     | 0.2394                   | 0.4545                          | Yes                    |
| <i>IDH2</i>     | 1110                     | 0.2375                   | 0.4588                          | Yes                    |
| <i>VDAC3</i>    | 1111                     | 0.2375                   | 0.4653                          | Yes                    |
| <i>ATP6V1E1</i> | 1143                     | 0.2361                   | 0.4696                          | Yes                    |
| <i>BAX</i>      | 1164                     | 0.2348                   | 0.4745                          | Yes                    |
| <i>COX4I1</i>   | 1175                     | 0.2345                   | 0.4803                          | Yes                    |
| <i>ATP5ME</i>   | 1204                     | 0.2330                   | 0.4846                          | Yes                    |
| <i>NDUFAB1</i>  | 1206                     | 0.2330                   | 0.4910                          | Yes                    |
| <i>ATP5MC2</i>  | 1252                     | 0.2299                   | 0.4940                          | Yes                    |
| <i>NDUFS3</i>   | 1255                     | 0.2298                   | 0.5001                          | Yes                    |
| <i>NDUFS7</i>   | 1264                     | 0.2294                   | 0.5059                          | Yes                    |
| <i>UQCRH</i>    | 1295                     | 0.2280                   | 0.5099                          | Yes                    |
| <i>ECH1</i>     | 1309                     | 0.2271                   | 0.5152                          | Yes                    |
| <i>ACAA2</i>    | 1347                     | 0.2252                   | 0.5187                          | Yes                    |



| <b>GENE</b>     | <b>RANK IN GENE LIST</b> | <b>RANK METRIC SCORE</b> | <b>RUNNING ENRICHMENT SCORE</b> | <b>CORE ENRICHMENT</b> |
|-----------------|--------------------------|--------------------------|---------------------------------|------------------------|
| <i>NDUFB3</i>   | 1372                     | 0.2236                   | 0.5231                          | Yes                    |
| <i>ATP5PF</i>   | 1444                     | 0.2207                   | 0.5239                          | Yes                    |
| <i>NDUFA1</i>   | 1452                     | 0.2204                   | 0.5295                          | Yes                    |
| <i>COX7A2</i>   | 1458                     | 0.2201                   | 0.5352                          | Yes                    |
| <i>TCIRG1</i>   | 1492                     | 0.2183                   | 0.5387                          | Yes                    |
| <i>ATP1B1</i>   | 1502                     | 0.2178                   | 0.5441                          | Yes                    |
| <i>MRPS22</i>   | 1542                     | 0.2159                   | 0.5471                          | Yes                    |
| <i>FH</i>       | 1574                     | 0.2141                   | 0.5507                          | Yes                    |
| <i>COX7B</i>    | 1614                     | 0.2120                   | 0.5537                          | Yes                    |
| <i>ATP5PB</i>   | 1646                     | 0.2106                   | 0.5572                          | Yes                    |
| <i>NDUFS4</i>   | 1685                     | 0.2081                   | 0.5601                          | Yes                    |
| <i>UQCRCQ</i>   | 1722                     | 0.2062                   | 0.5631                          | Yes                    |
| <i>ACAT1</i>    | 1761                     | 0.2046                   | 0.5659                          | Yes                    |
| <i>PRDX3</i>    | 1765                     | 0.2045                   | 0.5714                          | Yes                    |
| <i>MRPL34</i>   | 1794                     | 0.2030                   | 0.5749                          | Yes                    |
| <i>HADHB</i>    | 1847                     | 0.2005                   | 0.5765                          | Yes                    |
| <i>NDUFS2</i>   | 1895                     | 0.1989                   | 0.5785                          | Yes                    |
| <i>IDH3G</i>    | 1935                     | 0.1969                   | 0.5811                          | Yes                    |
| <i>COX7C</i>    | 1953                     | 0.1961                   | 0.5852                          | Yes                    |
| <i>DECR1</i>    | 2016                     | 0.1934                   | 0.5860                          | Yes                    |
| <i>IDH3B</i>    | 2044                     | 0.1922                   | 0.5893                          | Yes                    |
| <i>MDH1</i>     | 2082                     | 0.1903                   | 0.5918                          | Yes                    |
| <i>ETFB</i>     | 2116                     | 0.1893                   | 0.5945                          | Yes                    |
| <i>ATP5PO</i>   | 2332                     | 0.1804                   | 0.5835                          | Yes                    |
| <i>TIMM9</i>    | 2334                     | 0.1802                   | 0.5884                          | Yes                    |
| <i>COX7A2L</i>  | 2353                     | 0.1794                   | 0.5920                          | Yes                    |
| <i>DLD</i>      | 2414                     | 0.1772                   | 0.5925                          | Yes                    |
| <i>OAT</i>      | 2448                     | 0.1758                   | 0.5949                          | Yes                    |
| <i>COX17</i>    | 2543                     | 0.1721                   | 0.5926                          | Yes                    |
| <i>NDUFB2</i>   | 2548                     | 0.1719                   | 0.5971                          | Yes                    |
| <i>MDH2</i>     | 2562                     | 0.1712                   | 0.6008                          | Yes                    |
| <i>HADHA</i>    | 2584                     | 0.1702                   | 0.6040                          | Yes                    |
| <i>GLUD1</i>    | 2776                     | 0.1634                   | 0.5943                          | Yes                    |
| <i>ISCA1</i>    | 2824                     | 0.1617                   | 0.5953                          | Yes                    |
| <i>VDAC1</i>    | 2938                     | 0.1575                   | 0.5912                          | Yes                    |
| <i>SLC25A12</i> | 2997                     | 0.1553                   | 0.5912                          | Yes                    |
| <i>NQO2</i>     | 3026                     | 0.1545                   | 0.5934                          | Yes                    |
| <i>MTX2</i>     | 3031                     | 0.1544                   | 0.5974                          | Yes                    |
| <i>COX6C</i>    | 3039                     | 0.1542                   | 0.6011                          | Yes                    |

| <b>GENE</b>     | <b>RANK IN GENE LIST</b> | <b>RANK METRIC SCORE</b> | <b>RUNNING ENRICHMENT SCORE</b> | <b>CORE ENRICHMENT</b> |
|-----------------|--------------------------|--------------------------|---------------------------------|------------------------|
| <i>ISCU</i>     | 3084                     | 0.1527                   | 0.6020                          | Yes                    |
| <i>TOMM22</i>   | 3121                     | 0.1516                   | 0.6035                          | Yes                    |
| <i>NDUFB6</i>   | 3209                     | 0.1486                   | 0.6012                          | Yes                    |
| <i>SLC25A3</i>  | 3236                     | 0.1475                   | 0.6033                          | Yes                    |
| <i>ATP6AP1</i>  | 3312                     | 0.1449                   | 0.6018                          | Yes                    |
| <i>NDUFB1</i>   | 3320                     | 0.1447                   | 0.6052                          | Yes                    |
| <i>ATP6V1G1</i> | 3349                     | 0.1436                   | 0.6071                          | Yes                    |
| <i>RHOT2</i>    | 3365                     | 0.1430                   | 0.6099                          | Yes                    |
| <i>PDHB</i>     | 3411                     | 0.1413                   | 0.6105                          | Yes                    |
| <i>COX15</i>    | 3452                     | 0.1399                   | 0.6114                          | Yes                    |
| <i>UQCRB</i>    | 3471                     | 0.1392                   | 0.6139                          | Yes                    |
| <i>TIMM17A</i>  | 3627                     | 0.1341                   | 0.6061                          | No                     |
| <i>TIMM50</i>   | 3790                     | 0.1288                   | 0.5976                          | No                     |
| <i>NDUFS8</i>   | 3814                     | 0.1280                   | 0.5994                          | No                     |
| <i>GRPEL1</i>   | 3844                     | 0.1273                   | 0.6008                          | No                     |
| <i>ACADVL</i>   | 3914                     | 0.1248                   | 0.5991                          | No                     |
| <i>CYB5A</i>    | 3925                     | 0.1244                   | 0.6018                          | No                     |
| <i>BDH2</i>     | 3990                     | 0.1223                   | 0.6004                          | No                     |
| <i>ABCB7</i>    | 4021                     | 0.1212                   | 0.6015                          | No                     |
| <i>ECHS1</i>    | 4233                     | 0.1149                   | 0.5890                          | No                     |
| <i>MFN2</i>     | 4355                     | 0.1115                   | 0.5831                          | No                     |
| <i>SUCLA2</i>   | 4441                     | 0.1083                   | 0.5798                          | No                     |
| <i>PHYH</i>     | 4463                     | 0.1074                   | 0.5812                          | No                     |
| <i>GPI</i>      | 4568                     | 0.1036                   | 0.5764                          | No                     |
| <i>NDUFB5</i>   | 4646                     | 0.1007                   | 0.5734                          | No                     |
| <i>VDAC2</i>    | 4672                     | 0.1000                   | 0.5743                          | No                     |
| <i>RETSAT</i>   | 4696                     | 0.0994                   | 0.5754                          | No                     |
| <i>ACO2</i>     | 4858                     | 0.0942                   | 0.5660                          | No                     |
| <i>ATP6V1H</i>  | 4901                     | 0.0929                   | 0.5655                          | No                     |
| <i>NDUFC2</i>   | 5001                     | 0.0896                   | 0.5606                          | No                     |
| <i>NDUFV1</i>   | 5020                     | 0.0892                   | 0.5617                          | No                     |
| <i>ATP6V0C</i>  | 5046                     | 0.0884                   | 0.5623                          | No                     |
| <i>NDUFA5</i>   | 5235                     | 0.0829                   | 0.5506                          | No                     |
| <i>MRPL35</i>   | 5702                     | 0.0681                   | 0.5179                          | No                     |
| <i>IDH3A</i>    | 5861                     | 0.0627                   | 0.5079                          | No                     |
| <i>ALAS1</i>    | 5912                     | 0.0608                   | 0.5059                          | No                     |
| <i>OPA1</i>     | 6014                     | 0.0573                   | 0.5000                          | No                     |
| <i>SDHA</i>     | 6043                     | 0.0564                   | 0.4994                          | No                     |
| <i>NDUFB8</i>   | 6162                     | 0.0528                   | 0.4921                          | No                     |

| <b>GENE</b>     | <b>RANK IN GENE LIST</b> | <b>RANK METRIC SCORE</b> | <b>RUNNING ENRICHMENT SCORE</b> | <b>CORE ENRICHMENT</b> |
|-----------------|--------------------------|--------------------------|---------------------------------|------------------------|
| <i>CYCS</i>     | 6352                     | 0.0472                   | 0.4794                          | No                     |
| <i>PDP1</i>     | 6484                     | 0.0436                   | 0.4709                          | No                     |
| <i>AIFM1</i>    | 6485                     | 0.0436                   | 0.4721                          | No                     |
| <i>NDUFV2</i>   | 6488                     | 0.0435                   | 0.4732                          | No                     |
| <i>PDHA1</i>    | 6493                     | 0.0434                   | 0.4741                          | No                     |
| <i>LDHB</i>     | 6540                     | 0.0419                   | 0.4718                          | No                     |
| <i>MPC1</i>     | 6631                     | 0.0389                   | 0.4662                          | No                     |
| <i>CASP7</i>    | 6696                     | 0.0371                   | 0.4625                          | No                     |
| <i>PMPCA</i>    | 6714                     | 0.0366                   | 0.4622                          | No                     |
| <i>PDHX</i>     | 6738                     | 0.0359                   | 0.4615                          | No                     |
| <i>COX10</i>    | 6761                     | 0.0350                   | 0.4608                          | No                     |
| <i>SLC25A20</i> | 6908                     | 0.0314                   | 0.4509                          | No                     |
| <i>OGDH</i>     | 6923                     | 0.0308                   | 0.4507                          | No                     |
| <i>ETFDH</i>    | 6936                     | 0.0304                   | 0.4506                          | No                     |
| <i>LRPPRC</i>   | 7065                     | 0.0260                   | 0.4418                          | No                     |
| <i>SDHD</i>     | 7137                     | 0.0235                   | 0.4372                          | No                     |
| <i>ACADM</i>    | 7207                     | 0.0213                   | 0.4327                          | No                     |
| <i>AFG3L2</i>   | 7272                     | 0.0193                   | 0.4285                          | No                     |
| <i>FDX1</i>     | 7279                     | 0.0192                   | 0.4285                          | No                     |
| <i>IMMT</i>     | 7499                     | 0.0124                   | 0.4126                          | No                     |
| <i>CPT1A</i>    | 7618                     | 0.0087                   | 0.4041                          | No                     |
| <i>MRPS30</i>   | 7980                     | -0.0032                  | 0.3774                          | No                     |
| <i>GOT2</i>     | 7996                     | -0.0037                  | 0.3764                          | No                     |
| <i>CS</i>       | 8013                     | -0.0042                  | 0.3753                          | No                     |
| <i>TOMM70</i>   | 8051                     | -0.0054                  | 0.3727                          | No                     |
| <i>SDHC</i>     | 8388                     | -0.0153                  | 0.3482                          | No                     |
| <i>DLST</i>     | 8430                     | -0.0167                  | 0.3456                          | No                     |
| <i>HSPA9</i>    | 8755                     | -0.0272                  | 0.3223                          | No                     |
| <i>NNT</i>      | 9074                     | -0.0374                  | 0.2998                          | No                     |
| <i>MTRR</i>     | 9272                     | -0.0440                  | 0.2864                          | No                     |
| <i>DLAT</i>     | 9306                     | -0.0453                  | 0.2852                          | No                     |
| <i>PDK4</i>     | 9675                     | -0.0560                  | 0.2594                          | No                     |
| <i>SUPV3L1</i>  | 10475                    | -0.0846                  | 0.2024                          | No                     |
| <i>ACADSB</i>   | 10670                    | -0.0920                  | 0.1906                          | No                     |
| <i>NDUFS1</i>   | 11054                    | -0.1086                  | 0.1652                          | No                     |
| <i>FXN</i>      | 11279                    | -0.1185                  | 0.1518                          | No                     |
| <i>ALDH6A1</i>  | 11340                    | -0.1209                  | 0.1507                          | No                     |
| <i>NDUFA9</i>   | 11380                    | -0.1228                  | 0.1512                          | No                     |
| <i>MTRF1</i>    | 12137                    | -0.1610                  | 0.0995                          | No                     |

| <b>GENE</b>    | <b>RANK IN GENE LIST</b> | <b>RANK METRIC SCORE</b> | <b>RUNNING ENRICHMENT SCORE</b> | <b>CORE ENRICHMENT</b> |
|----------------|--------------------------|--------------------------|---------------------------------|------------------------|
| <i>COX11</i>   | 12165                    | -0.1630                  | 0.1020                          | No                     |
| <i>NDUFA7</i>  | 12198                    | -0.1652                  | 0.1042                          | No                     |
| <i>SLC25A4</i> | 12452                    | -0.1810                  | 0.0904                          | No                     |

**Table S9. Gene Set (FAILED\_HEART\_ATRIUM\_DN) with genes down-regulated in atria of failing hearts.**

| <b>GENE</b>     | <b>RANK IN GENE LIST</b> | <b>RANK METRIC SCORE</b> | <b>RUNNING ENRICHMENT SCORE</b> | <b>CORE ENRICHMENT</b> |
|-----------------|--------------------------|--------------------------|---------------------------------|------------------------|
| <i>LDHA</i>     | 0                        | 0.4979                   | 0.0253                          | Yes                    |
| <i>PGK1</i>     | 32                       | 0.4054                   | 0.0435                          | Yes                    |
| <i>IFITM1</i>   | 48                       | 0.3934                   | 0.0624                          | Yes                    |
| <i>LAPTM4A</i>  | 136                      | 0.3521                   | 0.0738                          | Yes                    |
| <i>PSMB4</i>    | 151                      | 0.3481                   | 0.0904                          | Yes                    |
| <i>COX6A1</i>   | 168                      | 0.3438                   | 0.1067                          | Yes                    |
| <i>PSMB5</i>    | 214                      | 0.3314                   | 0.1202                          | Yes                    |
| <i>SPTSSA</i>   | 232                      | 0.3283                   | 0.1356                          | Yes                    |
| <i>VTI1B</i>    | 236                      | 0.3276                   | 0.1520                          | Yes                    |
| <i>PRDX1</i>    | 273                      | 0.3207                   | 0.1656                          | Yes                    |
| <i>RRAGA</i>    | 295                      | 0.3174                   | 0.1801                          | Yes                    |
| <i>TMEM147</i>  | 312                      | 0.3145                   | 0.1949                          | Yes                    |
| <i>IFNGR1</i>   | 377                      | 0.3044                   | 0.2056                          | Yes                    |
| <i>CD59</i>     | 414                      | 0.2996                   | 0.2182                          | Yes                    |
| <i>MAD2L1BP</i> | 472                      | 0.2907                   | 0.2287                          | Yes                    |
| <i>TXN</i>      | 487                      | 0.2897                   | 0.2424                          | Yes                    |
| <i>ACOT13</i>   | 528                      | 0.2853                   | 0.2539                          | Yes                    |
| <i>ATP6V0E1</i> | 551                      | 0.2825                   | 0.2666                          | Yes                    |
| <i>EIF3I</i>    | 558                      | 0.2817                   | 0.2804                          | Yes                    |
| <i>GSTP1</i>    | 804                      | 0.2583                   | 0.2754                          | Yes                    |
| <i>NUTF2</i>    | 816                      | 0.2566                   | 0.2876                          | Yes                    |
| <i>NME2</i>     | 848                      | 0.2546                   | 0.2983                          | Yes                    |
| <i>MPST</i>     | 866                      | 0.2532                   | 0.3098                          | Yes                    |
| <i>PSMB3</i>    | 892                      | 0.2512                   | 0.3207                          | Yes                    |
| <i>SRI</i>      | 996                      | 0.2445                   | 0.3255                          | Yes                    |
| <i>YWHAE</i>    | 1009                     | 0.2439                   | 0.3370                          | Yes                    |
| <i>MPP1</i>     | 1034                     | 0.2428                   | 0.3476                          | Yes                    |
| <i>RAN</i>      | 1076                     | 0.2396                   | 0.3567                          | Yes                    |
| <i>BLVRB</i>    | 1096                     | 0.2385                   | 0.3674                          | Yes                    |
| <i>GDE1</i>     | 1296                     | 0.2280                   | 0.3643                          | Yes                    |
| <i>FKBP9</i>    | 1345                     | 0.2253                   | 0.3721                          | Yes                    |
| <i>PARVB</i>    | 1375                     | 0.2236                   | 0.3813                          | Yes                    |
| <i>GTF3A</i>    | 1377                     | 0.2235                   | 0.3926                          | Yes                    |
| <i>HDGF</i>     | 1431                     | 0.2214                   | 0.3999                          | Yes                    |
| <i>ELOC</i>     | 1512                     | 0.2173                   | 0.4050                          | Yes                    |
| <i>IFITM3</i>   | 1547                     | 0.2157                   | 0.4135                          | Yes                    |

| <b>GENE</b>    | <b>RANK IN GENE LIST</b> | <b>RANK METRIC SCORE</b> | <b>RUNNING ENRICHMENT SCORE</b> | <b>CORE ENRICHMENT</b> |
|----------------|--------------------------|--------------------------|---------------------------------|------------------------|
| <i>LSM7</i>    | 1669                     | 0.2092                   | 0.4151                          | Yes                    |
| <i>SDF2</i>    | 1700                     | 0.2073                   | 0.4234                          | Yes                    |
| <i>PSMB1</i>   | 1730                     | 0.2059                   | 0.4318                          | Yes                    |
| <i>LAGE3</i>   | 1867                     | 0.1997                   | 0.4318                          | Yes                    |
| <i>RIT1</i>    | 2026                     | 0.1931                   | 0.4300                          | Yes                    |
| <i>ADRM1</i>   | 2040                     | 0.1924                   | 0.4388                          | Yes                    |
| <i>CTNNA1</i>  | 2161                     | 0.1873                   | 0.4394                          | Yes                    |
| <i>UBA3</i>    | 2174                     | 0.1863                   | 0.4480                          | Yes                    |
| <i>CLIC4</i>   | 2244                     | 0.1838                   | 0.4522                          | Yes                    |
| <i>PGM1</i>    | 2274                     | 0.1829                   | 0.4593                          | Yes                    |
| <i>OPTN</i>    | 2507                     | 0.1737                   | 0.4510                          | Yes                    |
| <i>STX4</i>    | 2519                     | 0.1732                   | 0.4590                          | Yes                    |
| <i>HINT1</i>   | 2614                     | 0.1693                   | 0.4606                          | Yes                    |
| <i>WARS1</i>   | 2654                     | 0.1681                   | 0.4663                          | Yes                    |
| <i>GLUD1</i>   | 2776                     | 0.1634                   | 0.4656                          | Yes                    |
| <i>PPM1A</i>   | 2829                     | 0.1616                   | 0.4700                          | Yes                    |
| <i>ACP1</i>    | 2913                     | 0.1582                   | 0.4719                          | Yes                    |
| <i>SUMO1</i>   | 2917                     | 0.1581                   | 0.4797                          | Yes                    |
| <i>ACVR1B</i>  | 2977                     | 0.1559                   | 0.4832                          | Yes                    |
| <i>RAB1A</i>   | 3063                     | 0.1533                   | 0.4847                          | Yes                    |
| <i>ZP3</i>     | 3245                     | 0.1472                   | 0.4788                          | Yes                    |
| <i>VAT1</i>    | 3247                     | 0.1472                   | 0.4862                          | Yes                    |
| <i>SLCO3A1</i> | 3394                     | 0.1418                   | 0.4826                          | No                     |
| <i>PLEKHB2</i> | 3572                     | 0.1355                   | 0.4764                          | No                     |
| <i>PSMD9</i>   | 3744                     | 0.1303                   | 0.4704                          | No                     |
| <i>TM9SF1</i>  | 3823                     | 0.1278                   | 0.4712                          | No                     |
| <i>FKBP1A</i>  | 3889                     | 0.1259                   | 0.4727                          | No                     |
| <i>SNU13</i>   | 4124                     | 0.1180                   | 0.4614                          | No                     |
| <i>CNIH1</i>   | 4277                     | 0.1137                   | 0.4560                          | No                     |
| <i>NPTN</i>    | 4392                     | 0.1104                   | 0.4532                          | No                     |
| <i>ACTB</i>    | 4442                     | 0.1082                   | 0.4550                          | No                     |
| <i>PSMA3</i>   | 4492                     | 0.1063                   | 0.4568                          | No                     |
| <i>DXO</i>     | 4506                     | 0.1060                   | 0.4612                          | No                     |
| <i>TMED10</i>  | 4697                     | 0.0994                   | 0.4522                          | No                     |
| <i>TAGLN</i>   | 4712                     | 0.0988                   | 0.4562                          | No                     |
| <i>PPP1CC</i>  | 5143                     | 0.0855                   | 0.4288                          | No                     |
| <i>LYPLA1</i>  | 5626                     | 0.0707                   | 0.3968                          | No                     |
| <i>MLEC</i>    | 5628                     | 0.0706                   | 0.4003                          | No                     |
| <i>APP</i>     | 5662                     | 0.0697                   | 0.4014                          | No                     |

| <b>GENE</b>     | <b>RANK IN GENE LIST</b> | <b>RANK METRIC SCORE</b> | <b>RUNNING ENRICHMENT SCORE</b> | <b>CORE ENRICHMENT</b> |
|-----------------|--------------------------|--------------------------|---------------------------------|------------------------|
| <i>GRB2</i>     | 5795                     | 0.0649                   | 0.3949                          | No                     |
| <i>CCZ1</i>     | 5809                     | 0.0645                   | 0.3973                          | No                     |
| <i>ITM2B</i>    | 5842                     | 0.0635                   | 0.3981                          | No                     |
| <i>SLC9A6</i>   | 6028                     | 0.0569                   | 0.3873                          | No                     |
| <i>EI24</i>     | 6051                     | 0.0560                   | 0.3886                          | No                     |
| <i>ACTN1</i>    | 6087                     | 0.0553                   | 0.3888                          | No                     |
| <i>DGUOK</i>    | 6106                     | 0.0548                   | 0.3902                          | No                     |
| <i>TNFAIP1</i>  | 6198                     | 0.0518                   | 0.3861                          | No                     |
| <i>ZNF22</i>    | 6271                     | 0.0494                   | 0.3833                          | No                     |
| <i>RAB9A</i>    | 6498                     | 0.0433                   | 0.3688                          | No                     |
| <i>NPRL2</i>    | 6584                     | 0.0406                   | 0.3646                          | No                     |
| <i>FAM131A</i>  | 6632                     | 0.0389                   | 0.3631                          | No                     |
| <i>STAT3</i>    | 6665                     | 0.0381                   | 0.3627                          | No                     |
| <i>YWHAZ</i>    | 6798                     | 0.0340                   | 0.3547                          | No                     |
| <i>MAP2K1</i>   | 7036                     | 0.0269                   | 0.3385                          | No                     |
| <i>PDCD6</i>    | 7055                     | 0.0264                   | 0.3385                          | No                     |
| <i>SS18</i>     | 7057                     | 0.0263                   | 0.3398                          | No                     |
| <i>PAFAH1B1</i> | 7568                     | 0.0102                   | 0.3027                          | No                     |
| <i>PAPOLA</i>   | 7661                     | 0.0074                   | 0.2962                          | No                     |
| <i>MYH10</i>    | 8023                     | -0.0044                  | 0.2698                          | No                     |
| <i>PIGH</i>     | 8156                     | -0.0090                  | 0.2605                          | No                     |
| <i>MCM3</i>     | 8273                     | -0.0124                  | 0.2526                          | No                     |
| <i>DDX21</i>    | 8409                     | -0.0159                  | 0.2434                          | No                     |
| <i>CDC16</i>    | 8447                     | -0.0172                  | 0.2416                          | No                     |
| <i>VAPB</i>     | 8555                     | -0.0206                  | 0.2347                          | No                     |
| <i>GPR137B</i>  | 9256                     | -0.0435                  | 0.1852                          | No                     |
| <i>TPM2</i>     | 9410                     | -0.0480                  | 0.1763                          | No                     |
| <i>HNRNPL</i>   | 9446                     | -0.0490                  | 0.1762                          | No                     |
| <i>TSC22D1</i>  | 9581                     | -0.0533                  | 0.1691                          | No                     |
| <i>LRRN3</i>    | 9588                     | -0.0534                  | 0.1713                          | No                     |
| <i>WASHC2C</i>  | 9754                     | -0.0595                  | 0.1622                          | No                     |
| <i>CTTN</i>     | 9764                     | -0.0600                  | 0.1645                          | No                     |
| <i>RPA1</i>     | 9829                     | -0.0623                  | 0.1630                          | No                     |
| <i>PODXL</i>    | 10110                    | -0.0715                  | 0.1459                          | No                     |
| <i>CAPN7</i>    | 10167                    | -0.0740                  | 0.1455                          | No                     |
| <i>KPNA6</i>    | 10174                    | -0.0742                  | 0.1489                          | No                     |
| <i>DAAM1</i>    | 10414                    | -0.0824                  | 0.1354                          | No                     |
| <i>SLC39A14</i> | 10434                    | -0.0832                  | 0.1382                          | No                     |
| <i>G3BP2</i>    | 10565                    | -0.0882                  | 0.1331                          | No                     |

| <b>GENE</b>    | <b>RANK IN GENE LIST</b> | <b>RANK METRIC SCORE</b> | <b>RUNNING ENRICHMENT SCORE</b> | <b>CORE ENRICHMENT</b> |
|----------------|--------------------------|--------------------------|---------------------------------|------------------------|
| <i>LGMN</i>    | 10628                    | -0.0907                  | 0.1331                          | No                     |
| <i>NUDT3</i>   | 10641                    | -0.0911                  | 0.1368                          | No                     |
| <i>UBE2I</i>   | 10698                    | -0.0929                  | 0.1374                          | No                     |
| <i>TGFBR3</i>  | 10714                    | -0.0934                  | 0.1410                          | No                     |
| <i>ST3GAL1</i> | 10719                    | -0.0936                  | 0.1455                          | No                     |
| <i>UBE3C</i>   | 10820                    | -0.0983                  | 0.1431                          | No                     |
| <i>LRBA</i>    | 10865                    | -0.1005                  | 0.1449                          | No                     |
| <i>SMPD4</i>   | 11030                    | -0.1075                  | 0.1383                          | No                     |
| <i>AMD1</i>    | 11417                    | -0.1242                  | 0.1161                          | No                     |
| <i>RAD1</i>    | 11545                    | -0.1301                  | 0.1133                          | No                     |
| <i>TGFBR2</i>  | 11613                    | -0.1327                  | 0.1151                          | No                     |
| <i>GSTM3</i>   | 12178                    | -0.1637                  | 0.0817                          | No                     |
| <i>CNN3</i>    | 12181                    | -0.1638                  | 0.0899                          | No                     |
| <i>KHDC4</i>   | 12325                    | -0.1721                  | 0.0881                          | No                     |
| <i>GSE1</i>    | 12915                    | -0.2202                  | 0.0558                          | No                     |



**Table S10. Gene Set (KAAB\_FAILED\_HEART\_VENTRICLE\_DN) with genes down-regulated in the ventricles of failing hearts.**

| <b>GENE</b>     | <b>RANK IN GENE LIST</b> | <b>RANK METRIC SCORE</b> | <b>RUNNING ENRICHMENT SCORE</b> | <b>CORE ENRICHMENT</b> |
|-----------------|--------------------------|--------------------------|---------------------------------|------------------------|
| <i>LDHA</i>     | 0                        | 0.4979                   | 0.0770                          | Yes                    |
| <i>SERPINB1</i> | 34                       | 0.4045                   | 0.1372                          | Yes                    |
| <i>IFITM1</i>   | 48                       | 0.3934                   | 0.1971                          | Yes                    |
| <i>FCER1G</i>   | 93                       | 0.3720                   | 0.2514                          | Yes                    |
| <i>ATP5MC1</i>  | 291                      | 0.3178                   | 0.2861                          | Yes                    |
| <i>TMEM147</i>  | 312                      | 0.3145                   | 0.3333                          | Yes                    |
| <i>IFNGR1</i>   | 377                      | 0.3044                   | 0.3757                          | Yes                    |
| <i>C1QB</i>     | 471                      | 0.2908                   | 0.4138                          | Yes                    |
| <i>NME2</i>     | 848                      | 0.2546                   | 0.4256                          | Yes                    |
| <i>IFITM2</i>   | 939                      | 0.2483                   | 0.4574                          | Yes                    |
| <i>PSME2</i>    | 1191                     | 0.2336                   | 0.4752                          | Yes                    |
| <i>PQBP1</i>    | 1205                     | 0.2330                   | 0.5103                          | Yes                    |
| <i>GTF3A</i>    | 1377                     | 0.2235                   | 0.5323                          | Yes                    |
| <i>IFITM3</i>   | 1547                     | 0.2157                   | 0.5533                          | Yes                    |
| <i>CD14</i>     | 1744                     | 0.2053                   | 0.5706                          | Yes                    |
| <i>WARS1</i>    | 2654                     | 0.1681                   | 0.5300                          | Yes                    |
| <i>NQO2</i>     | 3026                     | 0.1545                   | 0.5267                          | Yes                    |
| <i>PTDSS1</i>   | 3206                     | 0.1487                   | 0.5366                          | Yes                    |
| <i>ZP3</i>      | 3245                     | 0.1472                   | 0.5565                          | Yes                    |
| <i>VAT1</i>     | 3247                     | 0.1472                   | 0.5792                          | Yes                    |
| <i>F13A1</i>    | 3581                     | 0.1353                   | 0.5758                          | Yes                    |
| <i>IRAK1</i>    | 3762                     | 0.1298                   | 0.5826                          | Yes                    |
| <i>SLC31A2</i>  | 4915                     | 0.0924                   | 0.5125                          | No                     |
| <i>EBP</i>      | 5542                     | 0.0735                   | 0.4779                          | No                     |
| <i>ISG15</i>    | 5851                     | 0.0631                   | 0.4651                          | No                     |
| <i>RAB9A</i>    | 6498                     | 0.0433                   | 0.4244                          | No                     |
| <i>STAT3</i>    | 6665                     | 0.0381                   | 0.4181                          | No                     |
| <i>LPCAT4</i>   | 9111                     | -0.0386                  | 0.2448                          | No                     |
| <i>TSC22D1</i>  | 9581                     | -0.0533                  | 0.2187                          | No                     |
| <i>DAAM1</i>    | 10414                    | -0.0824                  | 0.1704                          | No                     |
| <i>SLC39A14</i> | 10434                    | -0.0832                  | 0.1819                          | No                     |
| <i>ATP2A2</i>   | 10823                    | -0.0984                  | 0.1686                          | No                     |
| <i>AMD1</i>     | 11417                    | -0.1242                  | 0.1444                          | No                     |
| <i>PPP2R5C</i>  | 11648                    | -0.1343                  | 0.1483                          | No                     |

**Figure S1.** Gene expression plots for all Differentially Expressed Genes. The matched case-control sets are plotted side by side. Cases are indicated in red, and controls are indicated in green.

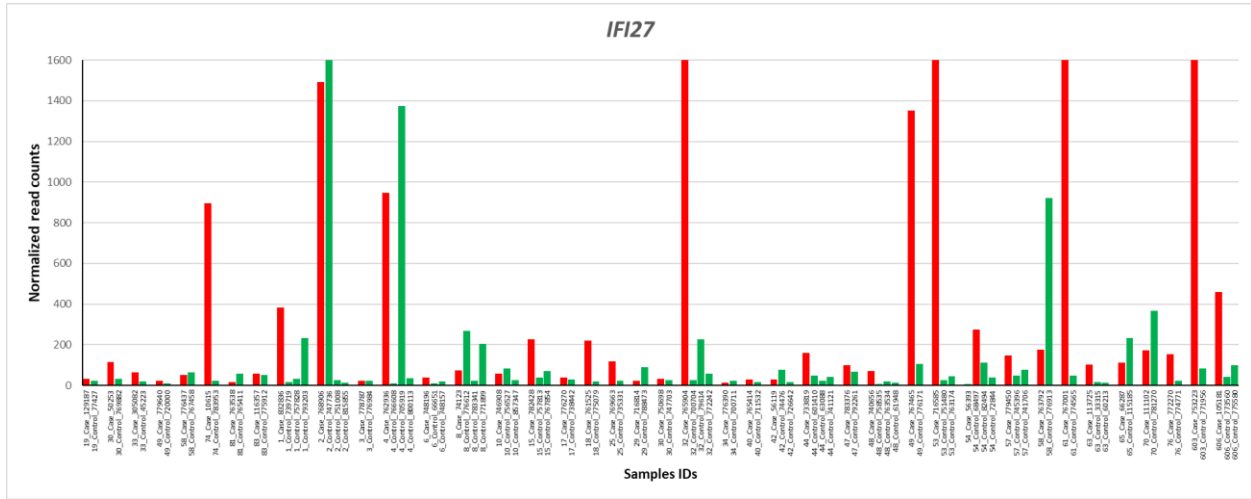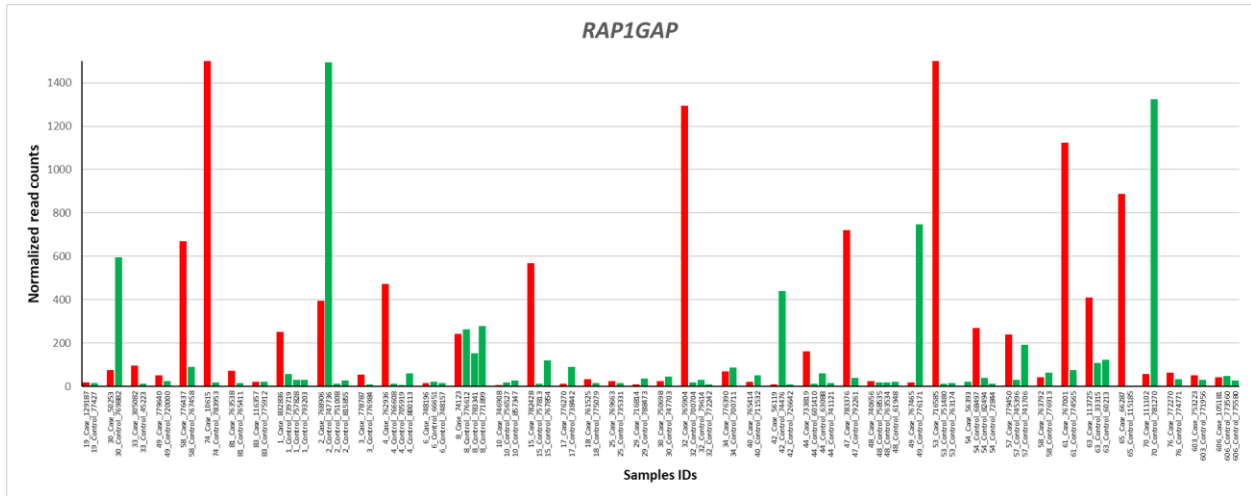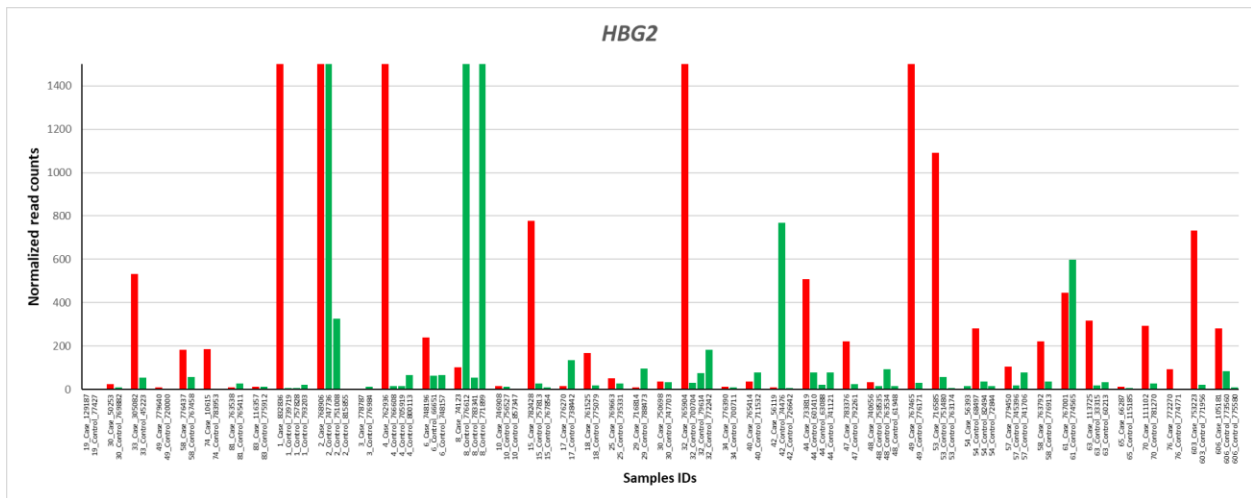



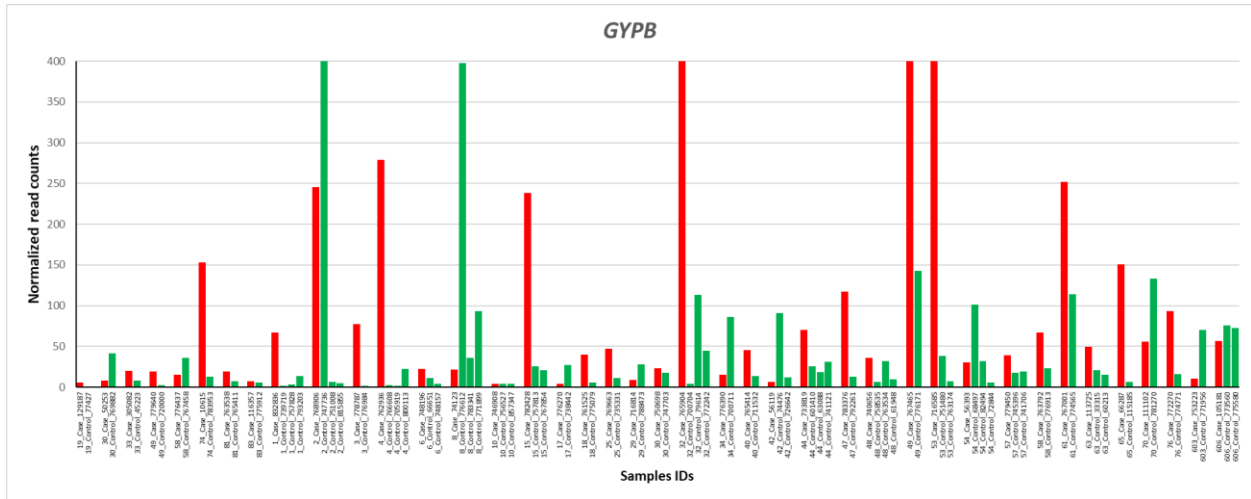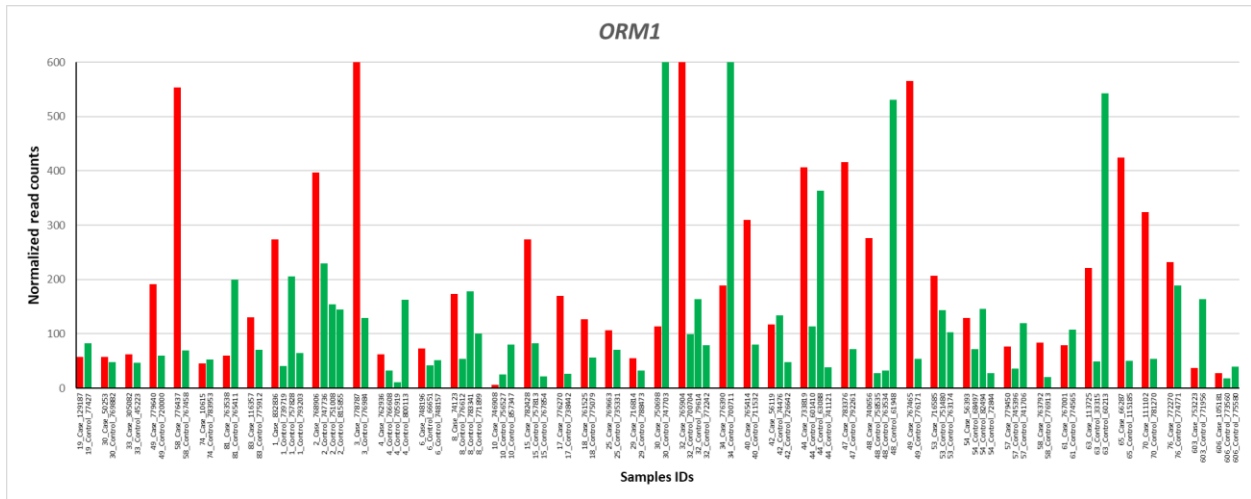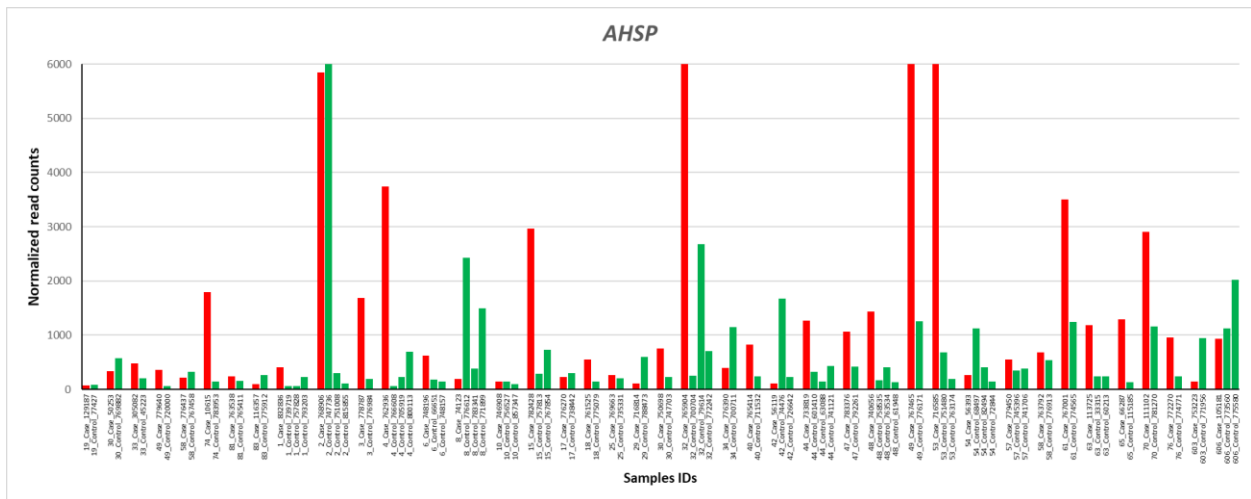

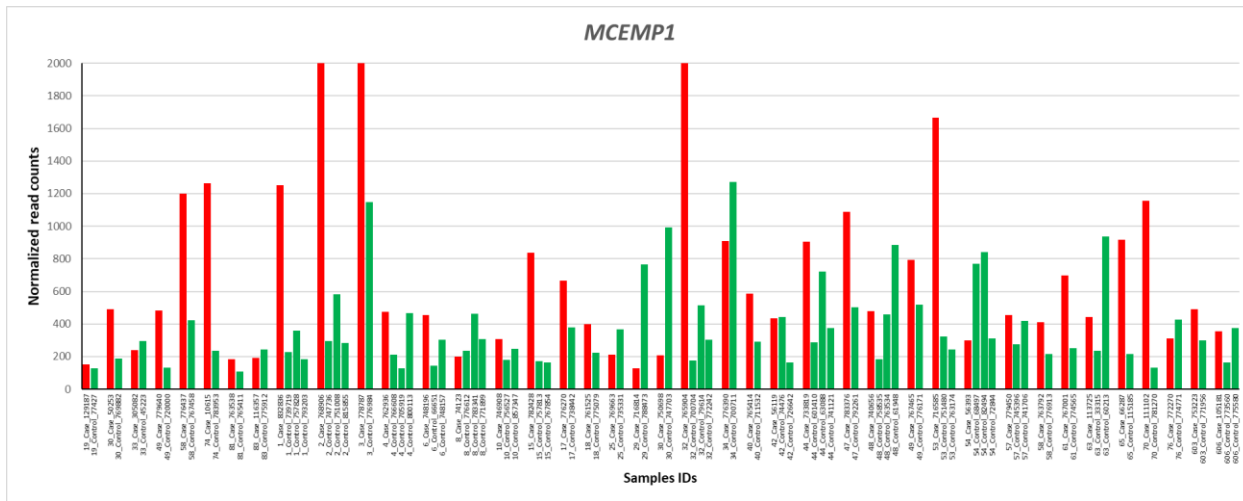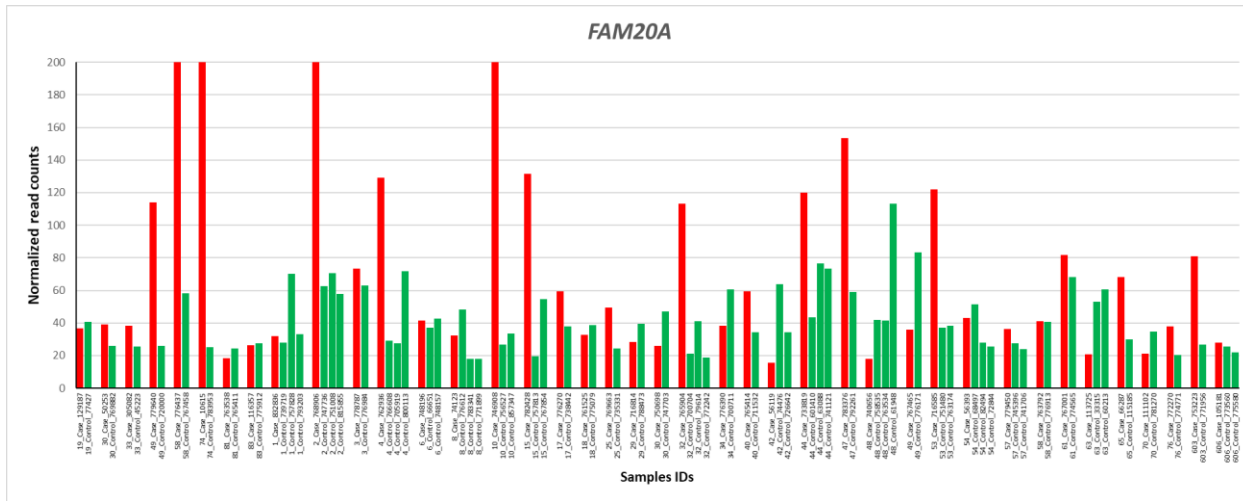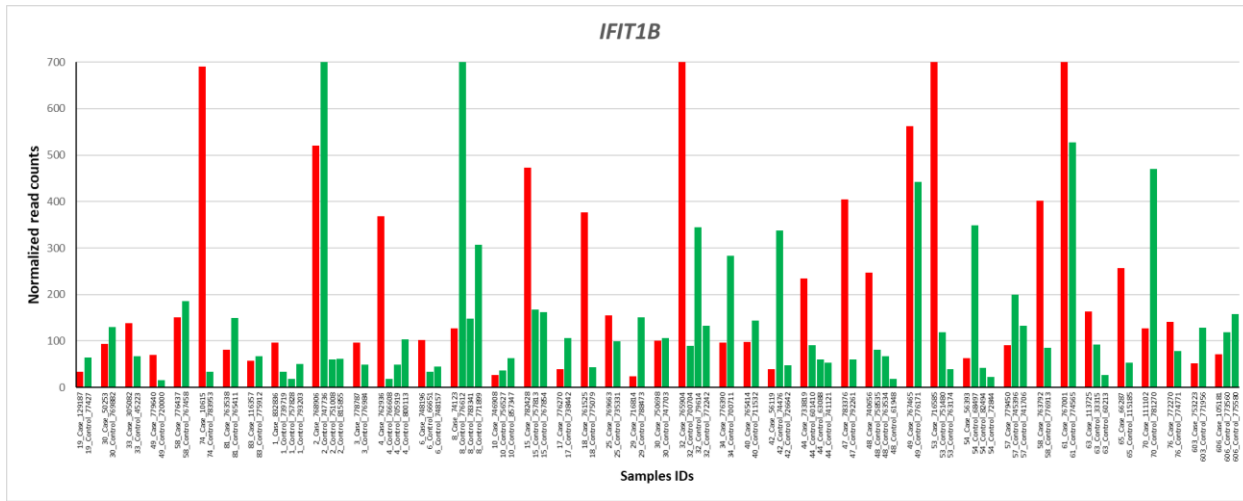

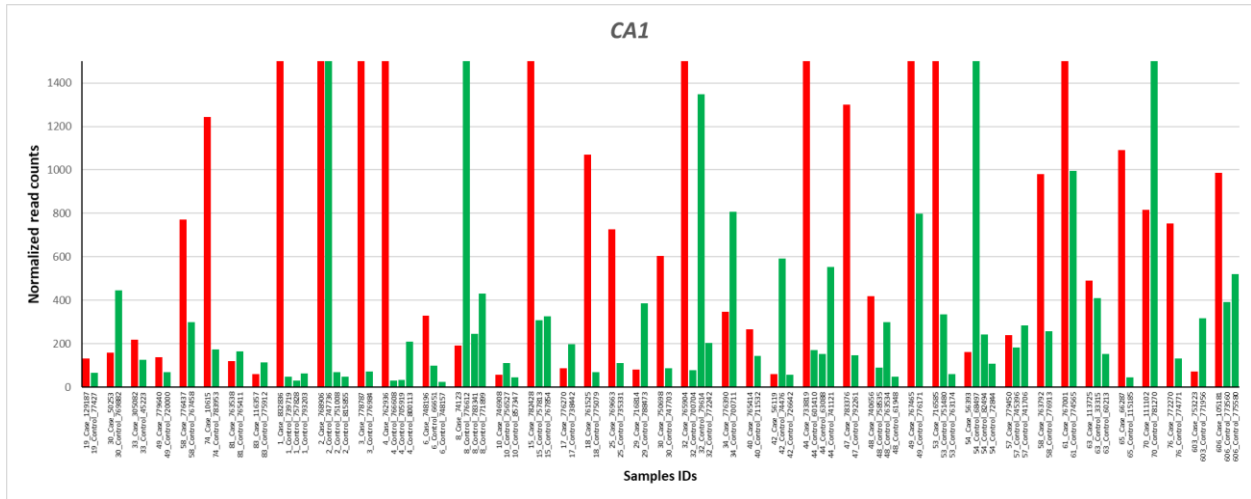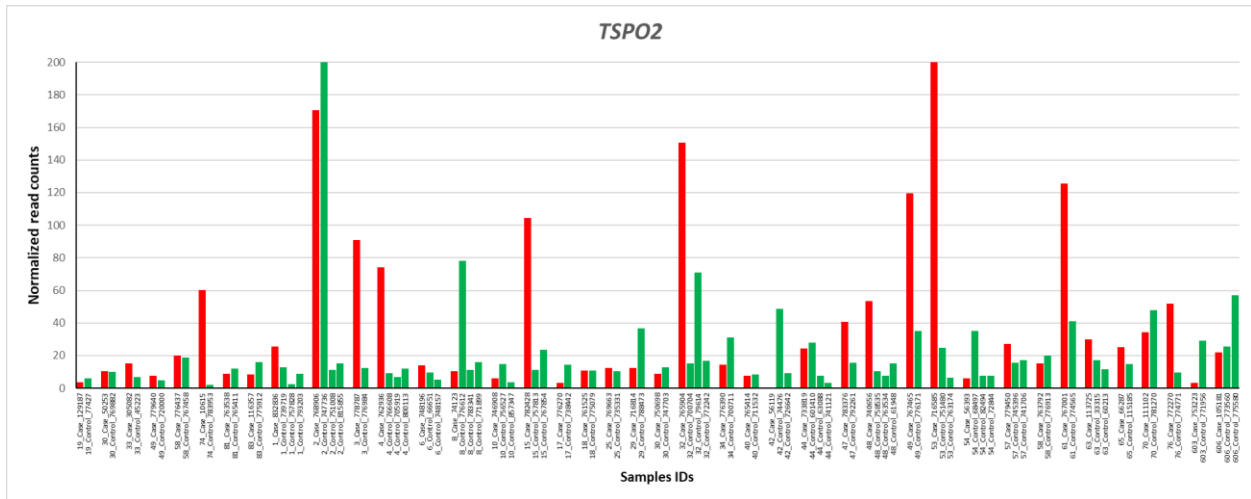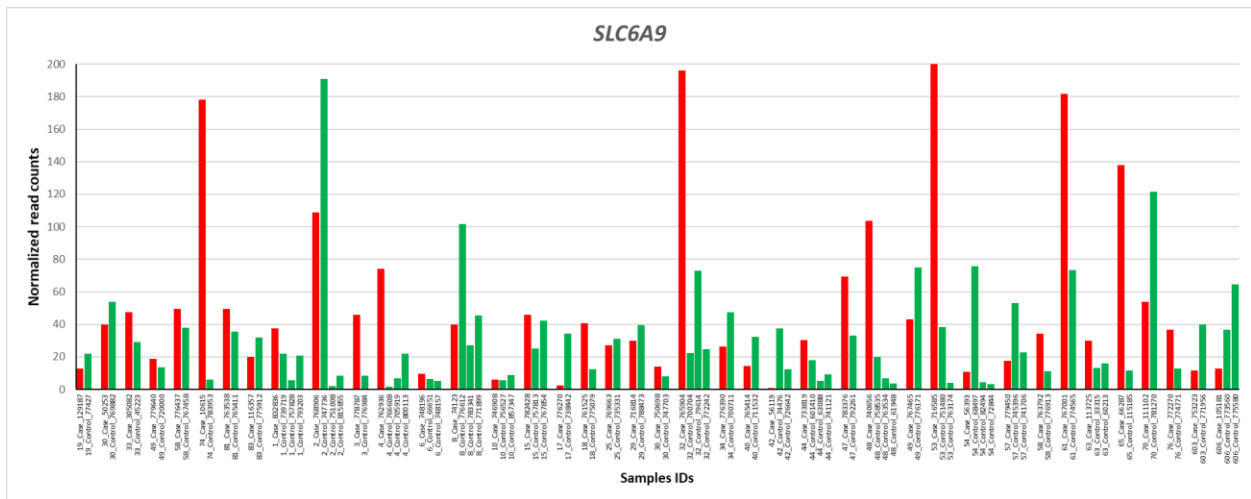

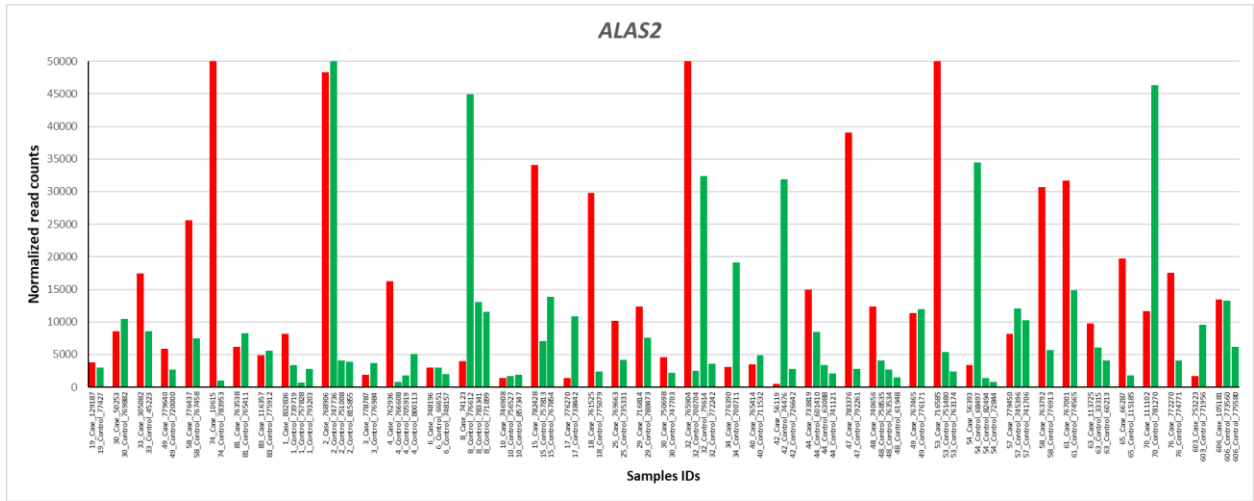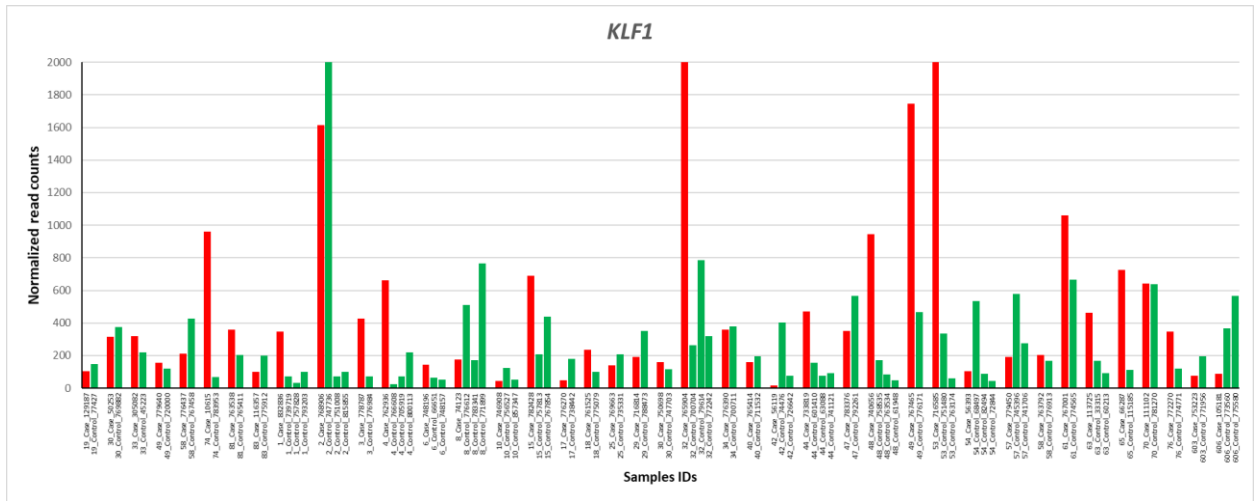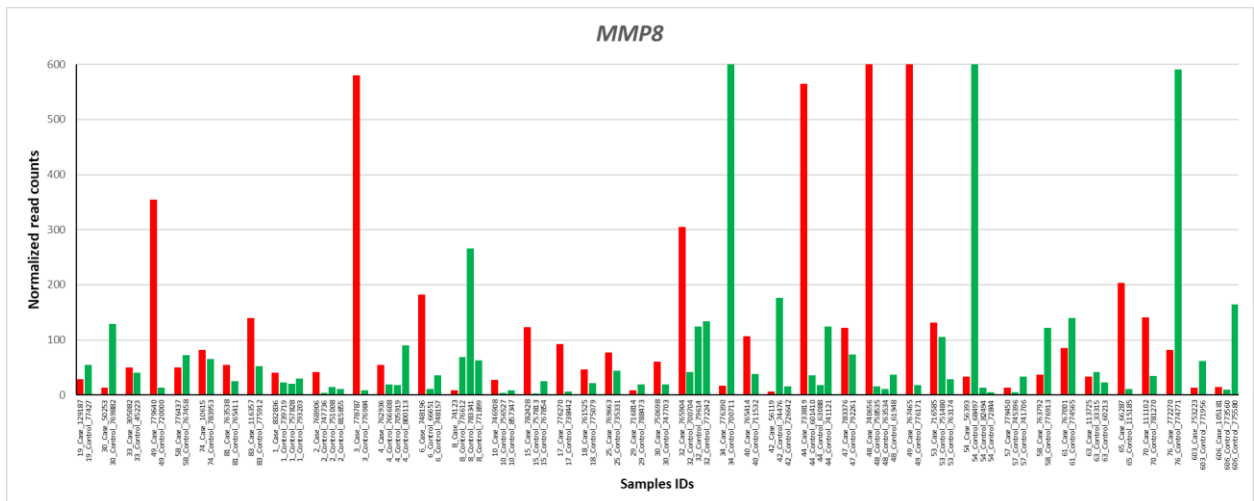





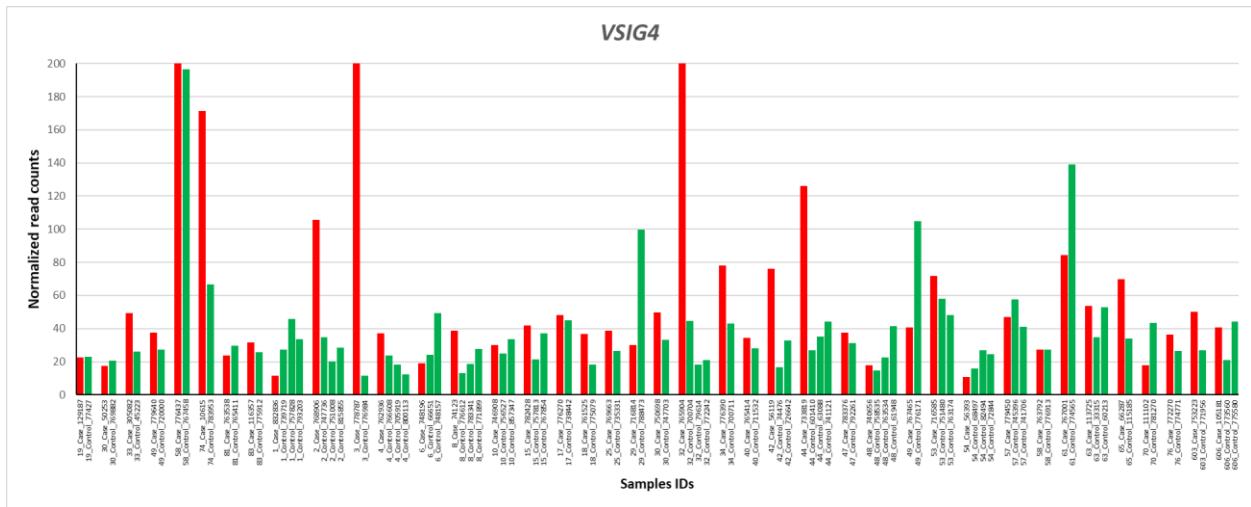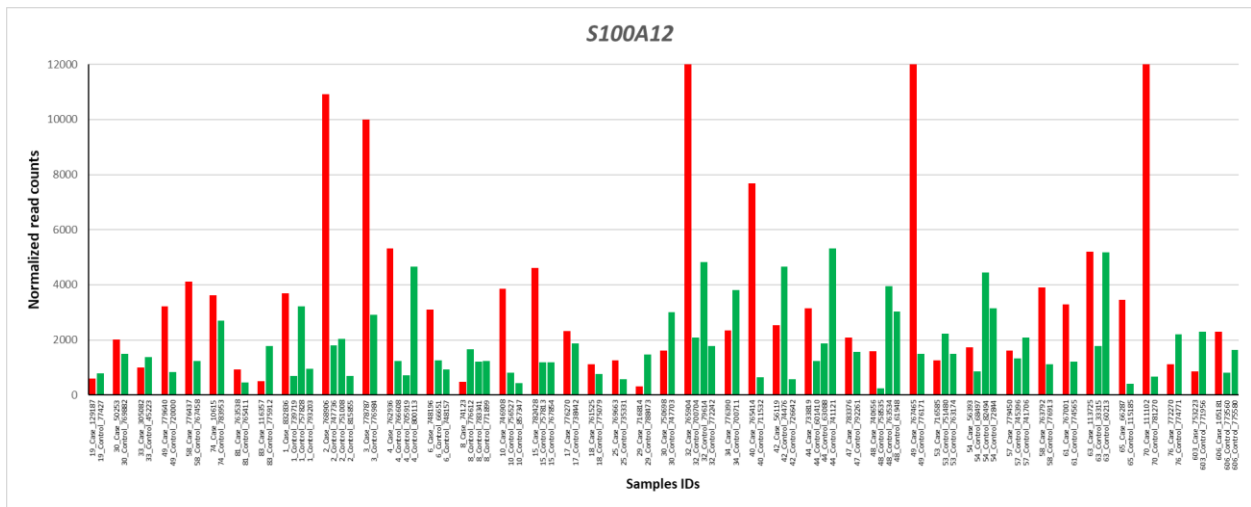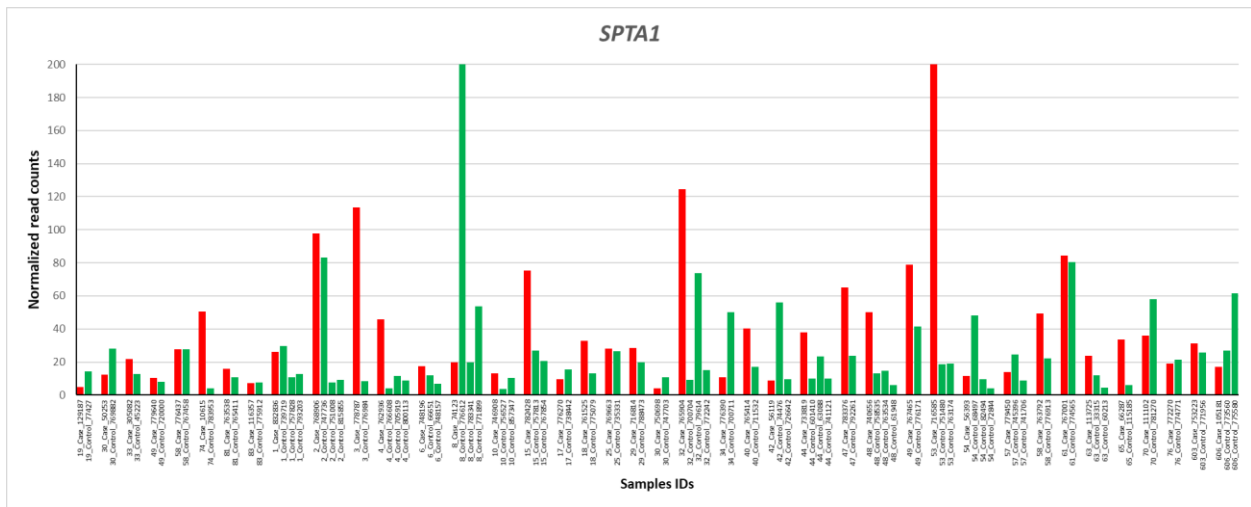

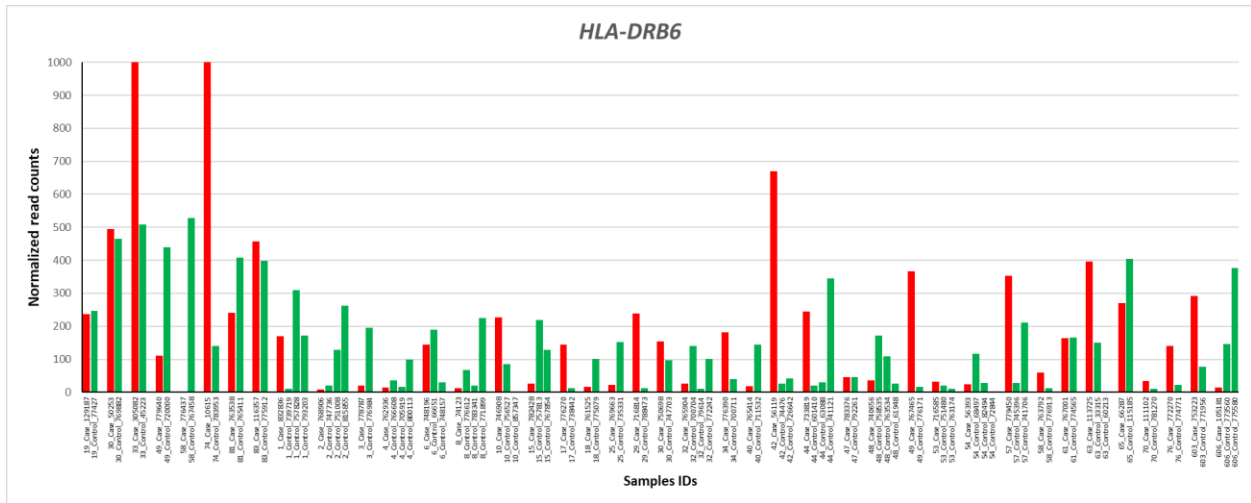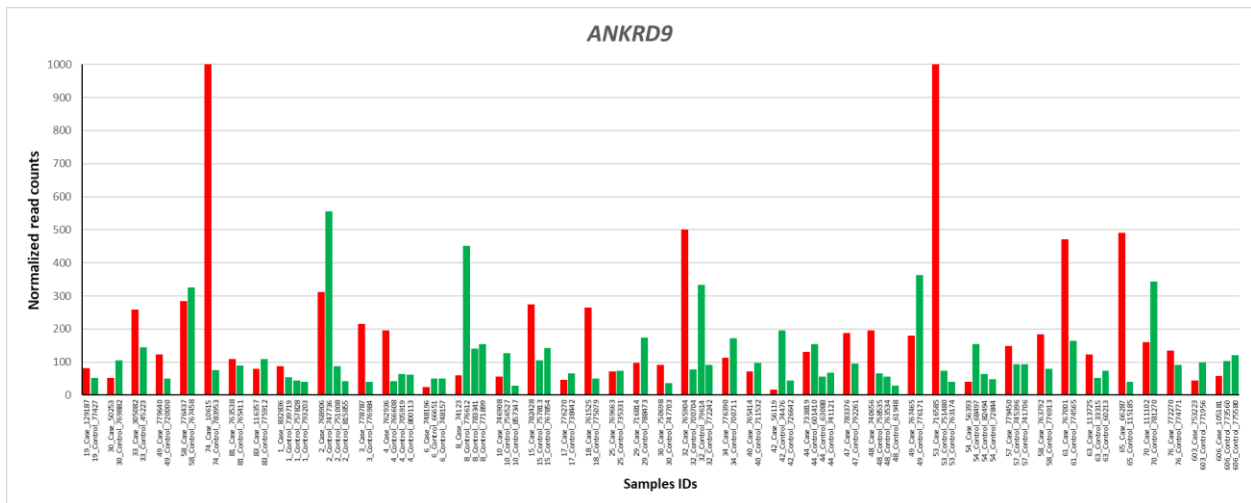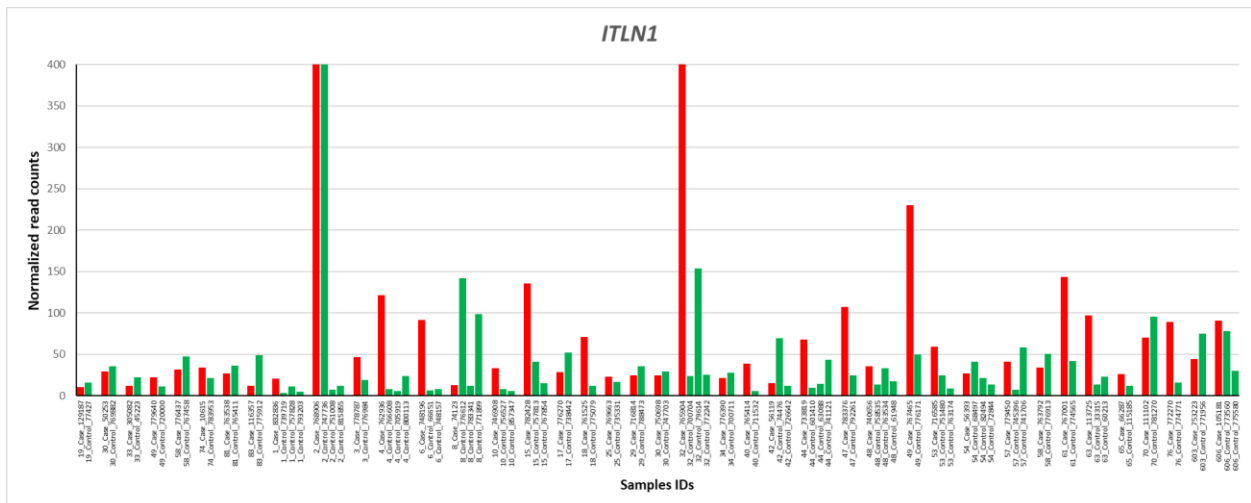





### IGKV1-27

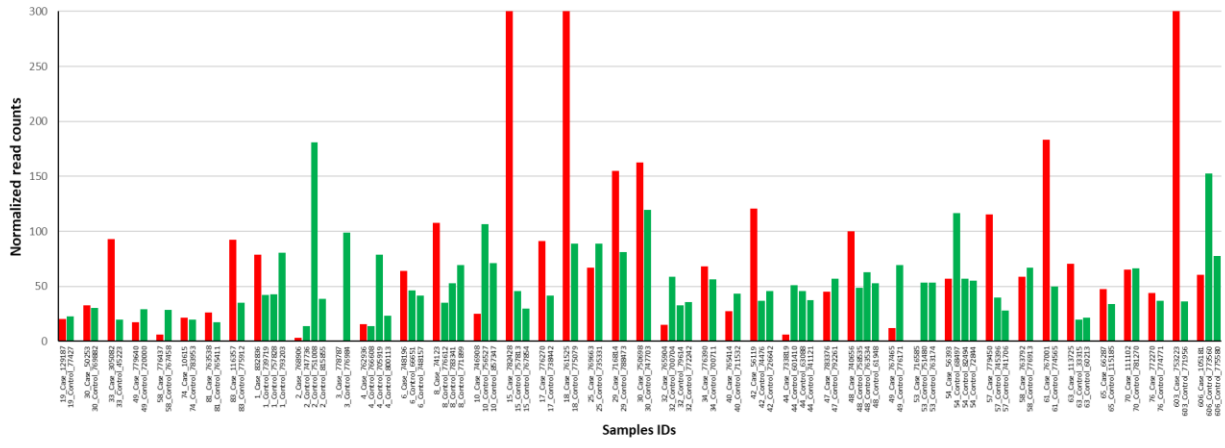

### NKX3-1

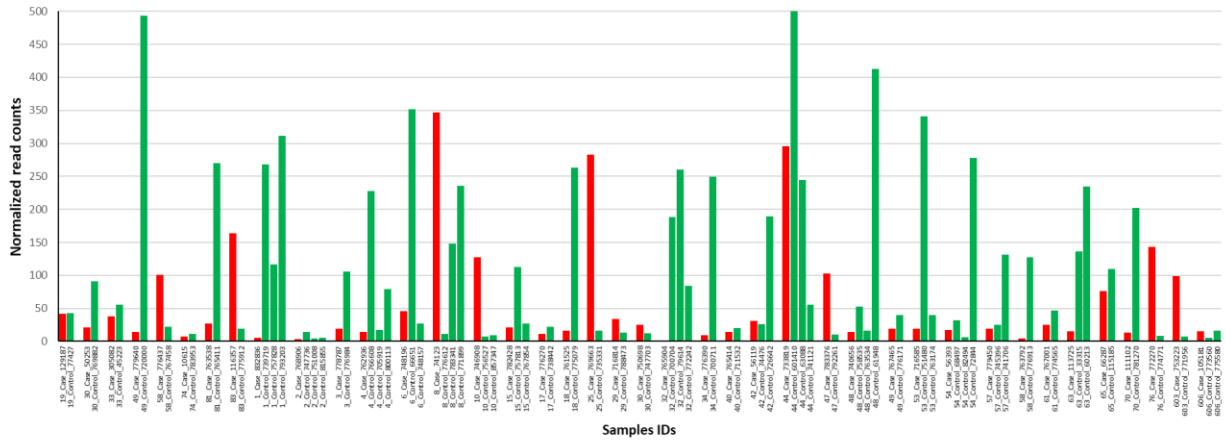

**Figure S2.** Validation of CRISPR/Cas9-mediated *LDHA* Knockout in an isogenic human induced pluripotent stem-cell line detected by Sanger sequencing. A 7-bp (Exon 2) deletion, confirmed by a qPCR of knockout by reverse transcription polymerase chain reaction.

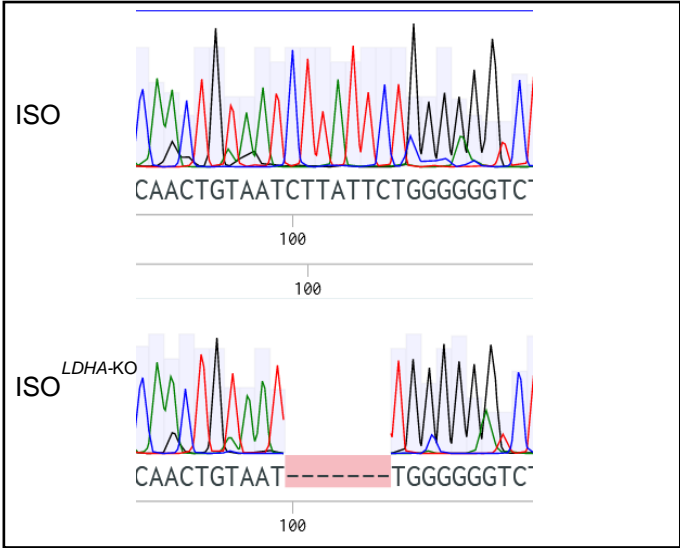

Supplement: JAH3-12-e029954-s001.pdf [file JAH3-12-e029954-s001.pdf]
